1 **Distinct Microbes, Metabolites, and Ecologies Define the Microbiome in Deficient and**  
2 **Proficient Mismatch Repair Colorectal Cancers**

3

4 Vanessa L. Hale<sup>1,2,3,\*</sup>, Patricio Jeraldo<sup>2,3,\*</sup>, Jun Chen<sup>2,4</sup>, Michael Mundy<sup>5</sup>, Janet Yao<sup>2</sup>, Sambhawa  
5 Priya<sup>6</sup>, Gary Keeney<sup>7</sup>, Kelly Lyke<sup>3</sup>, Jason Ridlon<sup>8</sup>, Bryan A. White<sup>8</sup>, Amy J. French<sup>7</sup>, Stephen N.  
6 Thibodeau<sup>7</sup>, Christian Diener<sup>9</sup>, Osbaldo Resendis-Antonio<sup>9,10</sup>, Jaime Gransee<sup>11</sup>, Tumpa Dutta<sup>11</sup>,  
7 Xuan-Mai Petterson<sup>11</sup>, Ran Blekhman<sup>6</sup>, Lisa Boardman<sup>12</sup>, David Larson<sup>13</sup>, Heidi Nelson<sup>2,13</sup>, and  
8 Nicholas Chia<sup>2,3,†</sup>.

9

10 <sup>1</sup>Department of Veterinary Preventive Medicine, The Ohio State University College of  
11 Veterinary Medicine, Columbus, OH, USA

12 <sup>2</sup>Microbiome Program, Center for Individualized Medicine, Mayo Clinic, Rochester, MN, USA

13 <sup>3</sup>Division of Surgical Research, Department of Surgery, Mayo Clinic, Rochester, MN, USA

14 <sup>4</sup>Department of Health Sciences Research, Mayo Clinic, Rochester, MN, USA

15 <sup>5</sup>Center for Individualized Medicine, Mayo Clinic, Rochester, MN, USA

16 <sup>6</sup>Department of Genetics, Cell Biology, and Development, University of Minnesota,  
17 Minneapolis, MN, USA

18 <sup>7</sup>Division of Laboratory Medicine and Pathology, Mayo Clinic, Rochester, MN, USA

19 <sup>8</sup>Carl R. Woese Institute for Genomic Biology, Department of Animal Sciences, Division of  
20 Nutritional Sciences, University of Illinois, Urbana-Champaign, IL, USA

21 <sup>9</sup>Human Systems Biology Laboratory, National Institute of Genomic Medicine, Mexico City,  
22 Mexico

23 <sup>10</sup>Coordinación de la Investigación Científica, Red de Apoyo a la Investigación, UNAM, Mexico  
24 City, Mexico

25 <sup>11</sup>Mayo Clinic Metabolomics Core Laboratory, Mayo Clinic, Rochester, MN, USA

26 <sup>12</sup>Division of Gastroenterology and Hepatology, Mayo Clinic, Rochester, MN, USA

27 <sup>13</sup>Division of Colon and Rectal Surgery, Department of Surgery, Mayo Clinic, Rochester, MN,  
28 USA

29 \*These authors contributed equally to this work

30 †Corresponding author: [chia.nicholas@mayo.edu](mailto:chia.nicholas@mayo.edu)

31

32

33 **ABSTRACT [350 word limit: 326]**

34 **Background**

35 The link between colorectal cancer (CRC) and the gut microbiome has been established, but the  
36 specific microbial species and their role in carcinogenesis remain controversial. Our  
37 understanding would be enhanced by better accounting for tumor subtype, microbial community  
38 interactions, metabolism, and ecology.

39

40 **Methods**

41 We collected paired colon tumor and normal-adjacent tissue and mucosa samples from 83  
42 individuals who underwent partial or total colectomies for CRC. Mismatch repair (MMR) status  
43 was determined in each tumor sample and classified as either deficient MMR (dMMR) or  
44 proficient MMR (pMMR) tumor subtypes. Samples underwent 16S rRNA gene sequencing and a  
45 subset of samples from 50 individuals were submitted for targeted metabolomic analysis to  
46 quantify amino acids and short-chain fatty acids. A PERMANOVA was used to identify the  
47 biological variables that explained variance within the microbial communities. dMMR and  
48 pMMR microbial communities were then analyzed separately using a generalized linear mixed  
49 effects model that accounted for MMR status, sample location, intra-subject sample correlation,  
50 and read depth. Genome-scale metabolic models were then used to generate microbial  
51 interaction networks for dMMR and pMMR microbial communities. We assessed global network  
52 properties as well as the metabolic influence of each microbe within the dMMR and pMMR  
53 networks.

54

## 55 **Results**

56 We demonstrate distinct roles for microbes in dMMR and pMMR CRC. Sulfidogenic  
57 *Fusobacterium nucleatum* and hydrogen sulfide production were significantly enriched in  
58 dMMR CRC, but not pMMR CRC. We also surveyed the butyrate-producing microbial species,  
59 but did not find a significant difference in predicted or actual butyrate production between  
60 dMMR and pMMR microbial communities. Finally, we observed that dMMR microbial  
61 communities were predicted to be less stable than pMMR microbial communities. Community  
62 stability may play an important role in CRC development, progression, or immune activation  
63 within the respective MMR subtypes.

64

## 65 **Conclusions**

66 Integrating tumor biology and microbial ecology highlighted distinct microbial, metabolic, and  
67 ecological properties unique to dMMR and pMMR CRC. This approach could critically improve  
68 our ability to define, predict, prevent, and treat colorectal cancers.

69

70

## 71 **Introduction**

72 The gut microbiota has been linked to colorectal cancer (CRC) in many studies [1–7], and serves  
73 as a very promising target for diagnostic, prophylactic, and therapeutic applications. Yet, despite  
74 intense study, only a few microbial species—like *Fusobacterium* species—are consistently  
75 observed across studies [5–8], while many microbial associations appear to be cohort-specific.  
76 Meta-analyses have attempted to overcome the limited statistical power of smaller studies [9]  
77 but are limited by the strong biases introduced through varying collection, sequencing, and data  
78 processing methodologies [10–13]. Mechanistic studies in mouse models have identified strong  
79 causative links between specific microbes (e.g. *Fusobacterium nucleatum*, *Bacteroides fragilis*)  
80 and CRC development and progression [14–17], but these models have limited applicability in  
81 genetically diverse human populations. Capturing some of this genetic diversity, on the other  
82 hand, may improve our ability to discriminate tumor and normal microbial communities and  
83 more clearly define pathways to CRC.

84

85 There are multiple subtypes of CRC: one broad categorization is based on mismatch repair  
86 (MMR) status. MMR status divides CRCs into two groups: deficient mismatch repair (dMMR)  
87 and proficient mismatch repair (pMMR)[18]. In general, dMMR CRCs are hypermethylated,  
88 hypermutated, and associated with BRAF V600E mutations; whereas, pMMR CRCs are  
89 generally microsatellite stable (MSS) and associated with KRAS[19]. These distinct molecular  
90 subtypes of CRC are also borne out by evidence that dMMR is specifically associated with the  $\beta$ -  
91 catenin signaling pathway[20]. Clinically, MMR status is associated with patient prognosis, and  
92 age, as well as tumor location and stage: Specifically, dMMR CRCs have a better prognosis and  
93 occur more often on the right side of the colon in older patients with early stage CRC[18].

94 Finally, dMMR and pMMR CRC not only have different endpoints, but may also have different  
95 paths to tumorigenesis[21] as supported emerging evidence that dMMR CRC arises from sessile  
96 serrated adenomas [22] as opposed to the more classic tubular adenoma associated with pMMR  
97 CRC [22].

98

99 The distinct phenotype of dMMR CRC suggests that host—and possibly also microbial—  
100 dynamics are greatly altered in association with deficient mismatch repair. However few CRC  
101 microbiome studies account for MMR status [23, 24] or microbial dynamics [2], and no studies,  
102 to our knowledge, have assessed both MMR status and microbial community dynamics.

103 Here, we undertook a new approach in a study involving 83 patients who underwent partial or  
104 total colectomy for CRC. From each patient, we collected colon tissue and mucosal samples at  
105 tumor and normal-adjacent sites. MMR status was extracted from patient records or determined  
106 by testing formalin-fixed paraffin embedded tumor tissue for the expression of four MMR  
107 proteins (MLH1, MSH2, MSH6, PMS2). Patient tumors were characterized as either deficient  
108 (dMMR) or proficient (pMMR) mismatch repair. Microbial composition was assessed via 16S  
109 rRNA gene sequencing. A subset of colon tissue samples additionally underwent metabolomic  
110 analysis to quantify amino acids and short-chain fatty acids (SCFAs). A portion of these data was  
111 published previously [2] in a study that highlighted the value of integrating *in silico* genome-  
112 scale metabolic model predictions and *in vivo* experimental metabolomic data.

113

114 From these data, we assessed the relative importance of MMR status compared to other  
115 biological factors reported to alter the microbiome[25]. MMR status was the strongest predictor

116 of microbial community variance in comparison to sample location (proximal/distal and on/off  
117 tumor), body mass index (BMI), age, and sex. Separate analyses of the dMMR and pMMR  
118 microbial communities revealed that many common CRC-associated microbial signatures[9,  
119 26]—including *Fusobacterium nucleatum*, *Fusobacterium periodonticum*, and *Bacteroides*  
120 *fragilis*—were all enriched in dMMR but not pMMR tumors. Functional differences were  
121 examined using a combination of metabolomics and community metabolic modeling. Our results  
122 indicate greater predicted and actual hydrogen sulfide production in dMMR CRC as compared to  
123 pMMR CRC, but no significant differences in predicted or actual butyrate production. Finally,  
124 we approximated microbial ecology by modeling the metabolic interactions between microbes.  
125 Overall, the pMMR microbial network was predicted to be more stable (resistant to  
126 disturbances). Microbial community stability may play an important role in tumorigenesis,  
127 cancer progression, and immune activation [22, 27, 28], and only by examining predicted  
128 microbial community interactions were we able to capture this dynamic. Our work demonstrates  
129 distinct microbial, metabolic, and ecological attributes of dMMR and pMMR microbial  
130 communities, serving to further emphasize the importance of considering tumor biology and  
131 microbial interactions in studies of the CRC microbiome.

132

## 133 **Methods**

### 134 **Human subject enrollment**

135 This study was performed with the approval of the Mayo Clinic Institutional Review Board  
136 (IRB# 14-007237 and IRB# 622-00). Written informed consent was obtained from all  
137 individuals in the study. Adults (older than 18 years old) who were determined to be candidates

138 for colorectal cancer surgery were voluntarily enrolled at Mayo Clinic in Rochester, Minnesota.  
 139 Exclusion criteria included chemotherapy or radiation in the 2 weeks leading up to enrollment.  
 140 Total or partial colectomies were performed on every patient, and colon tissue and mucosal  
 141 samples were collected from tumor and normal-adjacent sites. Sample location was defined as  
 142 follows: “proximal” samples were derived from the cecum and ascending colon. “Distal”  
 143 samples were derived from the transverse, descending, or sigmoid colon, or rectum. MMR status  
 144 was determined in 83 patients: 25 had dMMR CRC and 58 had pMMR CRC (**Table 1**). We used  
 145 univariable logistic regression (R v3.1.2) to compare demographic (age, sex, BMI, smoking  
 146 history) and disease features (tumor location and stage) between dMMR and pMMR groups.  
 147 **Table 1.** Demographic and disease features of individuals identified as having dMMR or pMMR  
 148 CRC.

|                              | dMMR    | pMMR    | p-value                                         |
|------------------------------|---------|---------|-------------------------------------------------|
| <b>Sex, n (%)</b>            |         |         |                                                 |
| Male                         | 10 (40) | 34 (59) | 0.122                                           |
| Female                       | 15 (60) | 24 (41) |                                                 |
| <b>Age , yr</b>              |         |         |                                                 |
| Mean (SD)                    | 74 (18) | 63 (13) | 0.002                                           |
| Range                        | 23-95   | 33-90   |                                                 |
| <b>BMI (SD)</b>              | 27 (5)  | 29 (8)  | 0.273                                           |
| <b>Smoke ever?</b>           |         |         |                                                 |
| Yes                          | 13 (52) | 28 (48) | 0.982                                           |
| No                           | 12 (48) | 30 (52) |                                                 |
| <b>Tumor location, n (%)</b> |         |         | p < 0.0001<br>between<br>proximal<br>and distal |
| Proximal Colon               | 18 (72) | 14 (24) |                                                 |
| Distal Colon                 | 7 (28)  | 43 (74) |                                                 |
| Both                         | 0       | 1 (3)   |                                                 |
| <b>Stage, n (%)</b>          |         |         | 0.0007<br>between<br>early and<br>late          |
| Early (1-2)                  | 18 (72) | 22 (38) |                                                 |
| Late (3-4)                   | 4 (16)  | 33 (57) |                                                 |
| Stage unknown                | 3 (12)  | 3 (5)   |                                                 |

149



150 **MMR status determination**

151 Mismatch repair (MMR) pathway and microsatellite instability (MSI) test results were extracted  
152 from patient records if available. For patients without MMR test results, banked formalin–fixed  
153 paraffin–embedded colon tumor tissue blocks were submitted to the Mayo Clinic Pathology  
154 Resource Core for sectioning into 10 micron–thick slices. Slices were then submitted to the  
155 Mayo Clinic Molecular Genetics Laboratory for immunohistochemistry staining of MMR  
156 proteins (MLH1, PMS2, MSH2, MSH6).

157

158 **16S DNA extraction, sequencing, and sequence processing**

159 DNA extraction[26] and library preparation on colon tissue (tumor and normal–adjacent), and  
160 mucosa were performed as described previously in the Mayo Clinic Microbiome Laboratory [2].  
161 Samples were submitted for 16S rRNA gene sequencing (V3–V5 region) at the Mayo  
162 Clinic Medical Genomics Facility (Illumina MiSeq, 2×300, 600 cycles, Illumina Inc.).  
163 Sequencing yielded a total of 41,400,384 reads with a median of 70,208 reads per sample. Reads  
164 were processed using DADA2 v1.6 to obtain error–corrected amplicon sequence variant  
165 representatives—analogue to operational taxonomic units with single-nucleotide resolution  
166 (sOTUs) [29]. sOTUs were annotated with genus–level taxonomy using the RDP Naïve  
167 Bayesian Classifier[30] as implemented in DADA2 and, if possible, to species level using  
168 DADA2, both against the SILVA 16S database, v132[31]. sOTUs annotated as Chloroplast and  
169 Mitochondria were removed. Resulting sOTUs were filtered for possible non-specific  
170 amplification using SortMeRNA v2.0[32] and Infernal v1.1.2[33]. sOTUs with fewer than 10  
171 reads across all samples were excluded. Multiple sequence alignment of the sOTUs was

172 performed using Infernal v1.1.2[33], and an approximate Maximum Likelihood phylogeny was  
173 calculated using FastTree v2.1.9[34]. Raw sequencing data can be found at the NCBI Sequence  
174 Read Archive with primary BioProject accession number PRJNA445346 (**Additional File 2** -  
175 sOTU table, **3** - sOTU taxonomy, **4**- sOTU fasta file).

176

### 177 **Statistical analyses of 16S rRNA microbial community data**

178 An unweighted UniFrac distance matrix [35] based on the microbial communities in all samples  
179 was generated using the phyloseq[36] package v1.22.3. A permutational multivariate analysis of  
180 variance (PERMANOVA) was then performed on the distance matrix to assess the effects of  
181 MMR status and sample location (proximal/distal and on/off tumor) on variance between  
182 microbial communities. The PERMANOVA additionally accounted for subject age, sex, BMI,  
183 and sample type (mucosa versus colon tissue) and was performed using the adonis2 function in  
184 the vegan[37] package v2.5-1, with 999 bootstrap iterations.

185

186 A Generalized Linear Mixed Model (GLMM)[38] was calculated for each sOTU to estimate its  
187 abundance (read counts) in relation to predictors that included MMR status and sample location  
188 (proximal/distal and on/off tumor). Models were corrected for subject intervariability, specimen  
189 type (mucosal vs tissue biopsy), and sequencing read depth, allowing for interactions. We used  
190 the package glmmTMB[39] v0.1.4 to estimate the abundance of each microbe under a zero-  
191 inflated Poisson distribution. For each predictor, sOTUs were excluded where the method did not  
192 converge or the Akaike Information Criterion (AIC) for model quality was not defined. Multiple  
193 hypothesis correction was calculated using the Benjamini–Hochberg procedure.

194

## 195 **Validation of differentially abundant microbes using an independent cohort**

196 To validate the differentially abundant microbes associated with dMMR status, we investigated  
197 data from a recent study that included microbiome profiling in tumor and matched normal tissue  
198 samples in 44 CRC patients [1]. We categorized MMR status based on microsatellite instability  
199 (MSI) / microsatellite stable (MSS) status (MSI was categorized as dMMR; MSS was  
200 categorized as pMMR) or downregulation of any of the 4 MMR genes (MLH1, MSH2, MSH6  
201 and PMS2) as assessed using RNA-Seq in the same samples. A cutoff ( $\log_2(\text{normal/tumor}) > =$   
202 1) was used to call a gene as downregulated in tumor. Altogether, we identified 9/44 patients as  
203 dMMR and the remaining 35/44 as pMMR. Using 16S rRNA gene microbiome characterization  
204 for these samples (as described in detail in [1]) we identified sOTUs associated with dMMR  
205 tumor/normal and pMMR tumor/normal conditions. We first filtered rare sOTUs, only  
206 preserving sOTUs found in at least 50% of our samples, and then performed differential  
207 abundance analysis using phyloseq[36] (which uses DESeq2 to build negative binomial  
208 generalized linear models). We used the Benjamini–Hochberg method to control for the false  
209 discovery rate (FDR).

210

## 211 **Real-time PCR for the *Bacteroides fragilis* toxin gene**

212 Real-time PCR was performed as described previously [2] to test colon tissue and mucosal  
213 samples for the presence of the *Bacteroides fragilis* toxin (BFT) genes in 22 dMMR individuals  
214 and 53 pMMR individuals. Primers included: BFT-F (5'-  
215 GGATAAGCGTACTAAAATACAGCTGGAT-3'), BFT-R (5'-

216 CTGCGAACTCATCTCCCAGTATAAA-3'), and the probe (5'-FAM-  
217 CAGACGGACATTCTC-NFQ-MGB-3')[14].

218

## 219 **Modeling microbial hydrogen sulfide production**

220 We predicted hydrogen sulfide production within dMMR and pMMR tumor and normal-  
221 associated microbial communities as described previously[2]. Briefly, we aligned 16S rRNA  
222 gene sequences for dMMR tumor and normal samples (colon tissue and mucosa) and pMMR  
223 tumor and normal samples against complete genomes in PATRIC and then generated genome-  
224 scale metabolic models of each microbe (**Additional File 1: Table S1**). Genome-scale  
225 metabolic models use gene annotations from a microbial genome to predict the metabolic inputs  
226 and outputs of that microbe. To predict how a microbe might interact within a community, we  
227 used MICOM, an open-source platform to assess microbial metabolic community interactions  
228 (<https://github.com/resendislab/micom>). Specifically, we evaluated hydrogen sulfide flux as a  
229 measure of hydrogen sulfide production within each microbial community.

230

## 231 **Metabolomics sample preparation and analysis**

232 Colon tissue and mucosa samples were prepared and run as described previously[2]. In brief,  
233 UPLC-MS was used to quantify amino acid proxies for hydrogen sulfide including serine,  
234 homoserine, lanthionine, L-cystathionine, and D-cystathionine. GC-MS was used to quantify  
235 SCFAs including acetate, propionate, isobutyrate, butyrate, isovaleric acid, valeric acid,  
236 isocaproic acid, and hexanoate[2]. Significance testing was performed using Kruskal-Wallis and  
237 Dunn's *post hoc* tests in R v3.4.1

238

### 239 **Microbial influence network**

240 To select sOTUs for the Microbial Influence Networks (MINs), we used GLMM results to  
241 choose tumor and normal-associated microbes in dMMR and pMMR samples with a linear  
242 effect size greater than 0.25, regardless of statistical significance. Effect size captures biological  
243 impact potential while significance measures certainty. In this case, we wanted to assess the  
244 metabolic influence (i.e., biological impact) of microbes in relation to their respective microbial  
245 communities; as such, it was more appropriate to filter by effect size. For each sOTU, the 16S  
246 rRNA gene consensus sequence was aligned against complete genome in the PATRIC system  
247 using VSEARCH v2.7.1, with a minimum nucleotide identity of 90%. When this procedure  
248 generated multiple top hits, we selected a genome, in order, to the most complete genome (fewer  
249 contigs), a type strain, a strain with a binomial name, and the closest match to the 16S taxonomy  
250 (when possible). For each genome, we then reconstructed and downloaded its corresponding  
251 genome-scale metabolic model using the PATRIC service. When sOTUs mapped to the same  
252 model, we used that model only once, effectively merging those sOTUs in further analysis, with  
253 an exception for when two sOTUs were associated with opposite conditions (i.e., tumor and  
254 normal-adjacent samples), in which case we discarded that model from further consideration.  
255 The decision to discard was also based on the observation that low identity hits or sOTUs with  
256 taxonomy not sufficiently resolved were typically involved in these few cases.

257

258 After obtaining the genome-scale metabolic models (GEMs), we calculated “growth” on  
259 complete media with no oxygen. This was done by calculating optimal metabolic reaction fluxes

260 using a Flux Balance Analysis[40], in which “growth” is the calculated flux of the reaction  
261 defining biomass for a microbe. We did this using a tool for assessing microbial metabolic  
262 interactions (MMinte) which evaluates the growth of microbes alone and when paired with  
263 another microbe [41]. Once single and paired growth values were calculated using the objective  
264 function given by MMinte[41], these values were then used to calculate the influence score. The  
265 interaction score,  $\alpha_{ij}$ , for each species,  $m$ , with a different species  $x$  was calculated as

$$266 \quad \alpha_{xm} = g(m|x) - g(x) \# \quad (1)$$

267 where  $g(x)$  was the growth rate of  $x$  alone, and  $g(m|x)$  was the growth rate of  $x$  in a  
268 community composed of both  $x$  and  $m$ . Based on these scores, we then calculated the  
269 unweighted metabolic influence of each individual microbial model on the other microbes in the  
270 community as the sum of the absolute value of the difference in growth rates when paired with  
271 species  $m$ ,

$$G_m = \sum_j |\alpha_{jm}| = \sum_j |g(m|j) - g(j)| \#(2)$$

272 This scoring closely follows the spirit of the scoring from the global interaction modeling in  
273 Sung *et al.*[42] with use of actual growth rates instead of summing over shared transporters.  
274 Metabolic modeling based on flux balance analysis, as described here, provides a means to  
275 calculate a rate in the change of growth, as normalized per unit mass, allowing us to take a  
276 simple sum in order to calculate influence under anaerobic conditions.

277

278 The percentage of negative interactions was calculated by counting the number of negative  
279 interactions over the number of total interactions in each microbial influence network (MIN).

280 Statistical significance was based on the probability of getting equivalent results in dMMR and  
281 pMMR networks using the measured distributions of negative and positive interactions in each  
282 network and a scheme of random selection with replacement.

283

284 Finally, the resulting MIN[42] was visualized using Cytoscape v3.6.1[43] with node and edge  
285 properties weighed according to influence score and influence, respectively. Initial visualization  
286 in Cytoscape was generated using the “Edge-weighted spring-embedded layout” with the  
287 parameters modified to avoid node collisions according to what worked best in each of the two  
288 cases. Node sizes and edge weights were likewise set according to the maximum and minimum  
289 values in dMMR and pMMR networks separately. Interactions below 10 in the case of dMMR  
290 and below 5 in the case of pMMR were excluded from the spring force layout computation in  
291 order to achieve better readability of the final network figure. Unconnected nodes that had no  
292 influence were not included in the visualization.

293

### 294 **Predicting butyrate production**

295 After we identified the most influential microbes in the dMMR and pMMR MINs, we then  
296 assessed the butyrate-producing potential of these microbes. We used the previously selected  
297 genome sequences for these microbes and queried the PATRIC service [44] for the presence of  
298 the following genes: butyrate kinase (EC 2.7.2.7) or acetate CoA-transferase (EC 2.8.3.8). These  
299 genes serve as markers for butyrate production pathways [45]. The presence of either gene was  
300 considered sufficient to establish that a bacterium was capable of producing butyrate.

301

302 **Results**

303 **dMMR tumors associated with older age and early stage, proximal tumors**

304 A total of 25 individuals with dMMR CRC and 58 individuals with pMMR CRC were involved  
305 in this study. Individuals with dMMR CRC were significantly older than individuals with pMMR  
306 CRC and significantly more likely to have an early stage, proximal tumor (**Table 1**). As such, we  
307 included age and sample location (proximal/distal and on/off tumor) as covariates in subsequent  
308 analyses.

309 **Tumor MMR status strongly predicts variance between microbial communities**

310 To assess factors that contributed to variance in the microbial community data, we performed a  
311 PERMANOVA analysis on unweighted UniFrac distances between microbial communities in  
312 each sample. We included MMR status, sample location (proximal/distal, on/off tumor), age,  
313 sex, BMI and sample type (colon tissue vs. mucosa) as potential predictors of the variance.  
314 Remarkably, we found that MMR status explained more of the variance than any of the other 6  
315 variables (**Additional File 1: Table S2**) even when MMR status was included as the last variable  
316 in the model (**Table 2**).

317 **Table 2.** Factors contributing to variance between microbial communities. MMR status was  
318 included as the last variable in this model and accounts for the greatest percent variance  
319 (PERMANOVA; see also **Additional File 1: Table S2**).

| Factors    | % Variation | R <sup>2</sup> | F        | Pr(>F)   |
|------------|-------------|----------------|----------|----------|
| <b>BMI</b> | 1.53        | 0.013438       | 8.028927 | 1.00E-04 |
| <b>Age</b> | 1.18        | 0.010349       | 6.183355 | 1.00E-04 |
| <b>Sex</b> | 1.77        | 0.015529       | 9.278172 | 1.00E-04 |



|                                                                                          |        |          |            |          |
|------------------------------------------------------------------------------------------|--------|----------|------------|----------|
| <b>Sample type</b>                                                                       | 1.92   | 0.016848 | 10.06614   | 1.00E-04 |
| <b>Sample location - proximal / distal</b>                                               | 2.07   | 0.018191 | 10.86858   | 1.00E-04 |
| <b>Sample location - on/off tumor</b>                                                    | 1.26   | 0.011050 | 6.60250    | 1.00E-04 |
| <b>MMR status</b>                                                                        | 2.11   | 0.018527 | 11.06941   | 1.00E-04 |
| <b>Sample location – proximal / distal:<br/>Sample location - on/off tumor</b>           | 0.21   | 0.001802 | 1.076725   | 0.3185   |
| <b>Sample location – proximal / distal:MMR<br/>status</b>                                | 1.10   | 0.009634 | 5.7563     | 1.00E-04 |
| <b>Sample location - on/off tumor:MMR<br/>status</b>                                     | 0.29   | 0.002572 | 1.537264   | 0.0411   |
| <b>Sample location – proximal / distal:Sample<br/>location - on/off tumor:MMR status</b> | 0.19   | 0.001670 | 0.99816721 | 0.4245   |
| <b>Residual</b>                                                                          | 100.21 | 0.880385 | NA         | NA       |
| <b>Total</b>                                                                             | 113.82 | 1        | NA         | NA       |

320

### 321 **Distinct microbial communities associated with pMMR and dMMR tumors**

322 Given the importance of MMR status to microbial community variance, we opted to assess

323 microbial abundances in tumor and normal samples for each MMR subtype independently. We

324 identified multiple differentially abundant sOTUs in dMMR and pMMR tumor samples as

325 compared to normal-adjacent samples using a generalized linear mixed model (GLMM) that

326 accounted for sample location, sample type, and intrasubject sample correlation (**Fig. 2**;

327 **Additional File 1: Figure S1** (Venn diagram showing counts of microbes in each group), **Table**

328 **S3** (table of microbes enriched in dMMR), **Table S4** (table of microbes enriched in pMMR).

329 Several major butyrate producers were identified in dMMR and pMMR tumor and normal

330 samples. Only one microbe—*Dorea longicatena*—was significantly enriched in both dMMR and

331 pMMR tumor samples. Four microbes had opposite associations with tumor or normal samples

332 depending on MMR status: *Faecalibacterium prausnitzii* A2-165 and *Blautia* sp. Marseille-

333 P2398 were significantly enriched in pMMR tumor and dMMR normal samples; *Coprococcus*  
334 *comes* ATCC 27758 and *Bacteroides massiliensis* B84634 were significantly enriched in dMMR  
335 tumor and pMMR normal samples. Notably, *Fusobacterium periodonticum*, *F. nucleatum*, and  
336 *Bacteroides fragilis*—microbes commonly associated with CRC[5, 14, 46–49]—were among the  
337 top most differentially abundant microbes in dMMR tumor samples but were not found to be  
338 differentially abundant in pMMR tumor samples.

339  
340 To validate these results, we used publicly available data from tumor and matched normal  
341 samples from 44 CRC patients[1]. Our validation analysis showed several overlapping  
342 associations of microbial genomes with respect to dMMR and pMMR in tumor and matched  
343 normal samples (**Additional File 1: Table S5, S6**). dMMR tumors were found enriched for  
344 *Bacteroides fragilis* ( $p=0.02$ , FDR  $p=0.37$ ) and *Fusobacterium* ( $p=0.03$ , FDR  $p=0.37$ ) while  
345 dMMR normal samples were enriched for *Dorea* ( $p=0.03$ , FDR  $p=0.37$ ) and an  
346 Erysipelotrichaceae bacterium ( $p=0.007$ , FDR  $p=0.31$ ) (**Additional File 1: Figure S2**). Even  
347 though these associations were not statistically significant after correcting for FDR, their trend of  
348 association overlaps with the results from the present study. Differentially abundant sOTUs  
349 between pMMR tumors versus normal included Ruminococcaceae, *Faecalibacterium prausnitzii*  
350 and *Bacteroides caccae*, which were also differentially abundant in the present study.

351  
352 As *B. fragilis* was significantly enriched in dMMR tumors, and there are well-established links  
353 between toxigenic *B. fragilis* and colorectal cancer [14, 46, 50], we next looked for the presence  
354 of the *B. fragilis* toxin (BFT) gene in dMMR and pMMR tissue and mucosa samples. Of the 22

355 individuals with dMMR CRC, only samples from 1 was BFT positive (5%); of 53 individuals  
356 with pMMR CRC, samples from 5 were BFT positive (9.4%). There was no significant  
357 difference in BFT presence between individuals with dMMR or pMMR CRC (Chi-squared,  $p =$   
358 0.477).

359

### 360 **Microbial hydrogen sulfide production enriched in the dMMR CRC tumors**

361 As sulfidogenic *F. nucleatum* and *F. periodonticum* were also significantly enriched in dMMR  
362 tumor samples, we decided to assess potential hydrogen sulfide production across groups  
363 (dMMR/pMMR, tumor/normal) by modeling hydrogen sulfide flux. We used microbial  
364 community metabolic models to predict hydrogen sulfide flux within each microbial community  
365 (dMMR tumor and normal, pMMR tumor and normal). The models produced a non-significant  
366 trend towards increased hydrogen sulfide flux in dMMR tumor samples (**Fig. 3a**). To get a more  
367 concrete measure of hydrogen sulfide production, we ran targeted metabolomics to quantify  
368 amino acid proxies (serine, homoserine, lanthionine, L-cystathionine, D-cystathionine) for  
369 hydrogen sulfide in dMMR and pMMR tumor and normal tissue samples (**Fig. 3b**). We observed  
370 a significant increase in lanthionine in dMMR tumor tissue over dMMR or pMMR normal tissue  
371 and pMMR tumor. Homoserine and L-Cystathionine were also significantly increased in both  
372 dMMR and pMMR tumor tissue as compared to normal-adjacent tissue. The metabolomics  
373 results suggest increased hydrogen sulfide production in tumor tissue—particularly in dMMR  
374 tumor tissue.

375

376 **pMMR microbial community predicted to be more stable and to suppress *F. nucleatum***

377 To further assess the potential metabolic interactions between tumor and normal-adjacent  
378 microbes in relation to MMR status, we constructed two metabolic influence networks (MIN;  
379 **Fig. 1**)[42]. The MIN highlights each microbe's predicted influence and interactions (growth  
380 enhancing or suppressing) in relation to other microbes in the community. We also evaluated an  
381 indirect measure of ecological stability[51] based on the percentage of predicted positive and  
382 negative interactions present within a given microbial community. Notably, the more negative  
383 interactions present within a community, the more stable that community is predicted to be[51].  
384 The dMMR microbial community exhibited 21.1% negative interactions while the pMMR  
385 microbial community exhibited significantly more (47.6%, binomial test,  $p < 0.0001$ ), suggesting  
386 that the pMMR community is more stable.

387

388 Also of note in relation to the dMMR MIN, *F. nucleatum* and *F. periodonticum* exhibit no  
389 metabolic interactions with the other microbes in the network and therefore were not included in  
390 the network visualization. In contrast, in the pMMR MIN, *F. nucleatum*—one of the most  
391 influential microbes—was uniformly suppressed by 34 out of 44 other pMMR-associated  
392 microbes, with zero positive interactions.

393

### 394 **Highly influential microbes include many butyrate producers**

395 Within the MINs, microbes that exhibit many or strong interactions with other microbes—either  
396 influencing or being influenced by—are classified as influential microbes. To examine the most  
397 influential microbes within each MIN, we identified all microbes with an influence score of 0.5  
398 standard deviations above the mean for dMMR and pMMR microbes, respectively (**Tables 3 –**

399 dMMR, 4 – pMMR). Characterization of the most influential microbes revealed that many of  
 400 these microbes are butyrate producers.

401 **Table 3.** List of basic properties for the most influential microbes in the dMMR MIN.

| dMMR-associated microbes                   | Influence score | tumor/normal | PATRIC genome ID | butyrate producer? | relevant citations |
|--------------------------------------------|-----------------|--------------|------------------|--------------------|--------------------|
| <i>Pseudomonas aeruginosa</i>              | 1732.80         | tumor        | 287.2537         |                    | [52]<br>402        |
| <i>Faecalibacterium prausnitzii</i> A2-165 | 1615.38         | normal       | 411483.3         | x                  | [53]<br>403        |
| <i>Ruminococcus torques</i> L2-14          | 1516.19         | normal       | 657313.3         |                    | [54]<br>404        |
| <i>Escherichia coli</i> K-12               | 1452.80         | normal       | 511145.12        |                    | [55]<br>405        |
| <i>Flavonifractor plautii</i>              | 1431.48         | normal       | 292800.4         |                    | [56]<br>405        |
| <i>Eubacterium ramulus</i>                 | 1407.40         | normal       | 39490.3          |                    | [56]<br>406        |
| <i>Dorea formicigenerans</i>               | 1407.33         | normal       | 411461.4         |                    | [57]<br>406        |
| <i>Roseburia intestinalis</i>              | 1401.32         | tumor        | 657315.3         | x                  | [53]<br>407        |
| <i>Faecalibacterium prausnitzii</i> SL3/3  | 1395.95         | normal       | 657322.3         | x                  | [53]<br>407        |
| <i>Streptococcus salivarius</i>            | 1395.74         | normal       | 1304.182         |                    | [58]<br>408        |
| <i>Ruminococcus torques</i> ATCC 27756     | 1393.15         | normal       | 411460.6         |                    | [54]<br>409        |
| <i>Clostridium symbiosum</i>               | 1382.77         | tumor        | 1512.4           | x                  | [59]<br>409        |
| <i>Pelotomaculum thermopropionicum</i>     | 1376.65         | normal       | 370438.4         |                    | [60]<br>410        |
| <i>Clostridium clostridioforme</i>         | 1368.34         | tumor        | 999403.4         | x                  | [61]<br>411        |
| <i>Coprobacillus</i> sp. 8_1_38FAA         | 1363.69         | normal       | 450746.3         | x                  | [62]<br>411        |

412

413

414 **Table 4.** List of basic properties for the most influential microbes in the pMMR MIN.

| pMMR-associated microbes                 | influence | tumor/normal | PATRIC genome ID | butyrate producer? | relevant citations |
|------------------------------------------|-----------|--------------|------------------|--------------------|--------------------|
| <i>Firmicutes bacterium ASF500</i>       | 1001.50   | tumor        | 1378168.3        |                    | [63]               |
| <i>Ruminococcus</i> sp. A254.MGS-254     | 951.21    | tumor        | 1637499.3        |                    | [64]               |
| <i>Bacteroides massiliensis</i> B84634 = | 833.96    | normal       | 1121098.3        |                    | [65]               |

|                                                           |        |        |           |   |          |
|-----------------------------------------------------------|--------|--------|-----------|---|----------|
| <i>Timone 84634 = DSM 17679 = JCM 13223 [PRJNA201686]</i> |        |        |           |   |          |
| <i>Fusobacterium nucleatum CTI-5</i>                      | 832.56 | tumor  | 1316586.3 |   | [47, 66] |
| <i>Prevotella copri DSM 18205</i>                         | 827.75 | tumor  | 537011.5  |   | [57]     |
| <i>Dorea longicatena</i>                                  | 821.96 | tumor  | 88431.7   |   | [57]     |
| <i>Clostridium bolteae 90A9</i>                           | 797.92 | tumor  | 997894.4  | x | [61]     |
| <i>Anaerotruncus colihominis DSM 17241</i>                | 780.61 | normal | 445972.6  | x | [67]     |
| <i>Coprococcus comes ATCC 27758</i>                       | 779.84 | normal | 470146.3  | x | [68]     |
| <i>Campylobacter gracilis strain ATCC 33236</i>           | 766.50 | tumor  | 824.5     |   | [69]     |

415

416 **Butyrate production did not differ between dMMR and pMMR microbial communities**

417 Given the predicted influence and differential abundance of butyrate-producing microbes in  
418 dMMR and pMMR, we decided to compare the butyrate-producing potential of the most  
419 influential tumor-associated microbes in dMMR and pMMR MINs by searching for genes  
420 involved in butyrate production within the functional annotation of these genomes in PATRIC.  
421 There were no significant differences in butyrate production-associated genes between dMMR  
422 and pMMR tumor-associated microbes (**Table 5**; Wilcoxon rank-sum test,  $p > 0.05$ ). To more  
423 fully assess community-wide butyrate production, we performed targeted metabolomics to  
424 quantify SCFA concentrations in tumor and normal-adjacent colon tissue. With the exception of  
425 isocaproic acid, which was significantly increased in dMMR tumor tissue, there were no  
426 significant differences in SCFA concentrations—including butyrate—between dMMR tumor and  
427 normal-adjacent or pMMR tumor and normal-adjacent tissue samples (**Fig. 4**).

428 **Table 5.** Percent of the most influential tumor-associated microbes in dMMR and pMMR CRC  
429 that contain a butyrate-producing pathway, as predicted by the presence of genes involved in  
430 butyrate production.

| Gene annotation         | EC number | dMMR  | pMMR  |
|-------------------------|-----------|-------|-------|
| Acetate CoA-transferase | 2.8.3.8   | 14.9% | 13.8% |
| Butyrate kinase         | 2.7.2.7   | 27.7% | 31.0% |

431

432 To further explore how the dMMR MIN could have multiple strongly influential butyrate–

433 producing microbes but no increase in butyrate production, we examined the predicted

434 interactions (positive and negative) of the most influential butyrate producers in the dMMR MIN

435 network (identified in **Table 3**). We found that butyrate producers were targets of more negative

436 interactions (26% negative interactions) as compared to all negative interactions in the dMMR

437 MIN network (21% negative interactions), suggesting growth suppression of butyrate producers

438 in the dMMR community (binomial test,  $p = 0.02$ ). In contrast, the most influential butyrate

439 producers in the pMMR MIN network (identified in **Table 4**) were not a target for increased

440 negative interactions (binomial test,  $p = 0.08$ ). We repeated this analysis using all differentially

441 abundant major butyrate producers in dMMR and pMMR microbial communities (identified in

442 **Fig. 2**). We found that while all butyrate producers (in dMMR or pMMR microbial

443 communities) were more likely to be targets of negative interactions, this was more strongly

444 evident in the dMMR microbial community (dMMR binomial test:  $p=6E-13$ , pMMR binomial

445 test  $p=0.008$ ).

446

## 447 Discussion

448 This study integrates tumor biology and microbial ecology in a novel and powerful approach to

449 understanding colorectal cancer. Our results indicate that MMR status is one of the strongest

450 predictors of microbial community variance; however, few studies [23, 24], to date, include

451 MMR status in microbial community analysis of colorectal cancer. Interestingly, we also  
452 identified several differentially abundant microbes associated with dMMR but not pMMR tumor  
453 samples including *F. nucleatum*, *F. periodonticum*, and *B. fragilis*. We further validated these  
454 findings in an independent cohort[1], which underscores the importance of including MMR  
455 status in future CRC microbiome studies. We additionally characterized the predicted and actual  
456 metabolic profiles of dMMR and pMMR individuals in relation to hydrogen sulfide and butyrate  
457 production, and we generated a network of predicted interactions within the dMMR and pMMR  
458 microbial communities.

459

460 Hydrogen sulfide has been reported to both promote and inhibit colorectal cancer [70–73]. To  
461 assess the role of hydrogen sulfide within our study, we looked for sulfidogenic bacteria,  
462 predicted hydrogen sulfide production using community metabolic models, and measured  
463 hydrogen sulfide concentrations through targeted metabolomics for amino acid proxies. We  
464 found two significantly enriched hydrogen sulfide-producing *Fusobacterium* species and  
465 significantly increased hydrogen sulfide concentrations in dMMR tumor samples. In the  
466 microbial influence network, both *Fusobacterium* species exhibited zero predicted interactions—  
467 positive or negative—with other microbes in the network. Together, this suggests that these  
468 *Fusobacterium* species grow abundantly and unchecked by other microbes, and have the  
469 potential to produce large quantities of hydrogen sulfide. In contrast, the *F. nucleatum* found in  
470 pMMR MIN was predicted to be the target of 34 (100%) negative interactions, suggesting that its  
471 growth and metabolic output (hydrogen sulfide) are highly suppressed in pMMR individuals.

472



473 These intriguing results leads us to speculate on the relationship between *Fusobacterium* species,  
474 hydrogen sulfide production and dMMR CRC. Notably, *Fusobacterium* species have previously  
475 been associated with hypermethylation of MLH1, MSI, BRAF mutations, and poorly  
476 differentiated tumors[4, 47]—all of which are characteristics of dMMR CRC[74]. Hydrogen  
477 sulfide—a cytotoxic, genotoxic gas—has also been associated with CRC[70, 71], although its  
478 role is somewhat controversial[72, 73]. A recent report indicates that colon cancer cells may  
479 respond to hydrogen sulfide in a bell-shaped dose-dependent manner: at high concentrations,  
480 hydrogen sulfide inhibits the proliferation of cancer cells, while at lower concentrations,  
481 hydrogen sulfide can stimulate the proliferation of cancer cells[73, 75]. In dMMR, if high levels  
482 of hydrogen sulfide (and hydrogen sulfide producers) inhibit cancer proliferation, then we would  
483 expect individuals with dMMR to present with earlier stage cancer—which is indeed the case in  
484 our cohort and other reported cohorts [65]. dMMR CRC has also been associated with lower  
485 recurrence rates and a better prognosis[74]. In opposition to these findings are studies showing  
486 that *F. nucleatum* can potentiate tumorigenesis and that *F. nucleatum*-associated CRCs have a  
487 worse prognosis [4, 5].

488

489 Besides *Fusobacterium*, *Bacteroides fragilis* was also found to be significantly enriched in  
490 dMMR tumor samples. Toxigenic *B. fragilis* has well-established and causative links to  
491 inflammation, and CRC[50, 76], and inflammation has been linked to hypermethylation[77]. As  
492 such, we tested dMMR and pMMR tissue and mucosa samples for the presence of the *B. fragilis*  
493 toxin (BFT) gene but did not find a significant difference in the presence of the BFT gene  
494 between dMMR and pMMR individuals. Given these results, it is unclear what the significance  
495 of increased *B. fragilis* is in the dMMR tumor samples.

496

497 Butyrate has been another subject of intense investigation in relation to gut health and CRC[54,  
498 57]. Conflicting work in murine models indicates that butyrate can act to repress or to accelerate  
499 polyp and tumor formation—resulting in the so-called butyrate paradox[78]. Recently, a dMMR  
500 CRC mouse model showed that microbially-produced butyrate accelerated tumorigenesis[24],  
501 indicating that the source of this paradox may have to do with the genetic model of CRC being  
502 used and that butyrate may therefore have different, even opposite, roles in different CRC  
503 subtypes. It was therefore intriguing that more butyrate producers were identified as highly  
504 influential in the dMMR MIN as compared to pMMR MIN. However, neither predicted  
505 (functional annotation) nor actual (metabolomic data) butyrate production differed significantly  
506 between dMMR and pMMR samples or tumor and normal samples in the metabolomic profile.  
507 One potential reason for this lack of difference surfaced when we examined the number of  
508 negative interactions targeted at butyrate producers in the dMMR and pMMR MINs. dMMR  
509 butyrate producers had a significantly higher probability of negative interactions as compared to  
510 pMMR butyrate producers. This suggests that, though present, these butyrate producers are being  
511 suppressed in dMMR microbial communities.

512

513 Negative interactions were also predicted to be significantly increased in the pMMR microbial  
514 community as a whole versus the dMMR microbial community. Negative interactions, implying  
515 competition, are an ecological hallmark of a stable community[51], which is both resistant and  
516 resilient to disturbance. We speculate that a less stable microbial community in dMMR  
517 individuals could mean constant community shifts and disturbances—resulting in increased

518 immune activation. The dMMR tumor phenotype is associated with increased immune  
519 response[74], which may play a role in inhibiting cancer cell proliferation of dMMR tumors.

520

521 Overall, our study demonstrates the importance and value in considering tumor biology (MMR  
522 status) and ecological interactions when evaluating microbial community data. Our work is  
523 primarily descriptive and incorporates host clinical features, microbiome, metabolome, and  
524 modeling data. While we make speculations based on these data, future prospective and  
525 mechanistic studies are needed to test these ideas. We also recognize that selecting sequenced  
526 genomes available in the database to represent 16S rRNA sOTUs cannot fully replace  
527 metagenomic sequencing given well-known strain-to-strain variation in gene content. However,  
528 these variations between strains are often largely in secondary metabolite pathways, rather than  
529 core metabolic function, which is the main target of our modeling analysis.

530

531 Another limitation of this study is our inability to attribute a source to metabolomic data. While  
532 butyrate is a microbial fermentation product, hydrogen sulfide and its amino acid proxies can be  
533 produced by both humans and bacteria. Thus, the enriched hydrogen sulfide we detect in dMMR  
534 tumor samples could potentially be attributed to increased hydrogen sulfide production within  
535 tumor tissue, and indeed, this has been reported[73]. If this was the solely case here however, we  
536 might expect to see similar increases in hydrogen sulfide in pMMR tumors—most of which are  
537 later in stage than dMMR tumors. We did not see this, suggesting that it is feasible that the  
538 increased hydrogen sulfide production in dMMR tumors is coming from an exogenous  
539 (microbial) source. Notably, microbially produced hydrogen sulfide can be generated from

540 multiple pathways including the respiration of dietary taurine and sulfate as well as the  
541 degradation of sulfomucins. The amino acid proxies we use to assess hydrogen sulfide  
542 production only capture some, but not all of these potential pathways, so we may have  
543 underestimated hydrogen sulfide production.

544

545 Finally, the field of genome-scale metabolic modeling has only recently encompassed tools for  
546 community metabolic analyses[79], and many of the tools[41, 42, 80] are sensitive to the  
547 underlying quality of the metabolic models[44, 81]. Models vary greatly depending on the  
548 presence and accuracy genome annotations which will generally improve over time. Future work  
549 aimed at understanding and verifying microbial dynamics in relation to MMR status or other  
550 CRC subtypes could dramatically improve our ability to define, predict, prevent, and treat  
551 colorectal cancers.

552

## 553 **Conclusions**

554 This study provides a novel framework in which to examine colorectal cancer:

- 555 1. Host-microbe interactions: Tumor MMR status strongly predicted microbial community  
556 variance and was associated with distinct microbial, metabolic, and interaction profiles.  
557 Our approach incorporating tumor MMR status, microbiome, metabolome and modeling  
558 data allowed us unique insights into the role of hydrogen sulfide and hydrogen sulfide  
559 producers within the dMMR microbial community. Tumor biology (e.g. MMR status)  
560 and microbial ecology are inextricably linked, and it is critical that future studies account  
561 for both in order to understand and more precisely classify the many pathways to CRC.

562 2. Microbe–microbe interactions: Microbial influence networks provided *in silico*  
563 predictions of community stability and microbial interactions that aligned with *in vivo*  
564 metabolomics data: Suppression of sulfidogenic *F. nucleatum* and significantly lower  
565 hydrogen sulfide production in pMMR, and suppression of butyrate–producing bacteria  
566 in dMMR—which may explain the lack of difference in butyrate production between  
567 dMMR and pMMR samples. The validation of *in silico* data with *in vivo* tests provides  
568 support for a future of precision medicine tools that can accurately predict disease and the  
569 potential effects of prophylactic or therapeutic interventions on the microbiome.  
570 Microbes act within communities, and understanding and predicting these interactions  
571 will be key to developing targeted mechanisms to help prevent or treat colorectal cancer.

572

## 573 **Acknowledgements**

574 We would first like to thank the patients who volunteered for this study. We also thank the many  
575 other individuals who made this work possible including members of the Mayo Clinic  
576 Microbiome Laboratory, study coordinators, students, colorectal surgeons, program directors,  
577 and pathology assistants. We also specially acknowledge Donna Felmlee Devine and Caitlin  
578 Foss-Baumgard for their assistance with patient records in relation to this study. Finally, we  
579 gratefully acknowledge the following funding sources: NIH (R01CA179243; N.C. and V.L.H.  
580 and R01CA170357; L.B.), the Mayo Clinic Center for Cell Signaling in Gastroenterology  
581 (NIDDK P30DK084567), the Mayo Clinic Metabolomics Resource Core Pilot and Feasibility  
582 Award (U24DK100469), the Fred C. Andersen Foundation (H.N. and N.C.), the Mayo Clinic  
583 Center for Individualized Medicine, The Randy Shaver Cancer Research and Community Fund  
584 (R.B.) the Minnesota Partnership for Biotechnology and Medical Genomics (R.B.), The Alfred

585 P. Sloan Foundation (R.B.) O.R.A thanks the financial support coming from the National  
586 Institute of Genomic Medicine (INMEGEN) to develop the computational tool used for the  
587 microbiome analysis (MICOM).

588

## 589 **Figure Legends**

590 **Fig. 1** Microbial influence networks for a) dMMR and b) pMMR microbial communities. Node  
591 size indicates a microbe's metabolic influence over other microbes. Edges are directional and  
592 weighted and indicate how one microbe affects the growth rate of another: grey edges indicate a  
593 positive interaction, i.e., predicted increase in growth when paired, while red edges indicate a  
594 negative interaction or a predicted suppression in growth when paired.

595 **Fig. 2** Microbes identified as differentially abundant in tumor as compared to normal samples  
596 (tissue and mucosa) from individuals with dMMR or pMMR CRC. Microbes are listed in order  
597 of significance from greatest to least. Microbes in bold font are enriched in both dMMR and  
598 pMMR samples. For example, *Coprococcus comes* ATCC 27758 is significantly enriched in  
599 dMMR tumor samples and pMMR normal samples. (GLMM, all microbes listed have a  
600 Benjamini–Hochberg p-value<0.05.)

601 **Fig. 3** a) Hydrogen sulfide flux predicted based on community metabolic modeling.  
602 b) Amino acid proxies for hydrogen sulfide were quantified using UPLC–MS on dMMR and  
603 pMMR tumor and normal–adjacent colon tissue samples (Kruskal–Wallis followed by Dunn's  
604 Test for *post hoc* comparisons: \*p <0.05; \*\*p<0.0005, \*\*\*p<0.0005, \*\*\*\*p<0.00005).

605 **Fig. 4** SCFAs in dMMR and pMMR tumor and normal–adjacent colon tissue samples (Kruskal–  
606 Wallis followed by Dunn's Test for *post hoc* comparisons: \*p <0.05).

607

608 **References**

609

610 1. Burns MB, Montassier E, Abrahante J, Priya S, Niccum DE, Khoruts A, et al. Colorectal  
611 cancer mutational profiles correlate with defined microbial communities in the tumor  
612 microenvironment. *bioRxiv*. 2018;:090795. doi:10.1101/090795.

613 2. Hale VL, Jeraldo P, Mundy M, Yao J, Keeney G, Scott N, et al. Synthesis of multi-omic data  
614 and community metabolic models reveals insights into the role of hydrogen sulfide in colon  
615 cancer. *Methods*. 2018. doi:10.1016/j.ymeth.2018.04.024.

616 3. Flemer B, Lynch DB, Brown JMR, Jeffery IB, Ryan FJ, Claesson MJ, et al. Tumour-  
617 associated and non-tumour-associated microbiota in colorectal cancer. *Gut*. 2017;66:633–43.  
618 doi:10.1136/gutjnl-2015-309595.

619 4. Mima K, Nishihara R, Qian ZR, Cao Y, Sukawa Y, Nowak JA, et al. *Fusobacterium*  
620 *nucleatum* in colorectal carcinoma tissue and patient prognosis. *Gut*. 2016;65:1973–80.  
621 doi:10.1136/gutjnl-2015-310101.

622 5. Kostic AD, Chun E, Robertson L, Glickman JN, Gallini CA, Michaud M, et al. *Fusobacterium*  
623 *nucleatum* Potentiates Intestinal Tumorigenesis and Modulates the Tumor-Immune  
624 Microenvironment. *Cell Host Microbe*. 2013;14:207–15.

625 6. Chen W, Liu F, Ling Z, Tong X, Xiang C. Human Intestinal Lumen and Mucosa-Associated  
626 Microbiota in Patients with Colorectal Cancer. *PLoS One*. 2012;7:e39743.  
627 doi:10.1371/journal.pone.0039743.

- 628 7. Flanagan L, Schmid J, Ebert M, Soucek P, Kunicka T, Liska V, et al. *Fusobacterium*  
629 *nucleatum* associates with stages of colorectal neoplasia development, colorectal cancer and  
630 disease outcome. *Eur J Clin Microbiol Infect Dis*. 2014.
- 631 8. Castellarin M, Warren RL, Freeman JD, Dreolini L, Krzywinski M, Strauss J, et al.  
632 *Fusobacterium nucleatum* infection is prevalent in human colorectal carcinoma. *Genome Res*.  
633 2012;22:299–306. doi:10.1101/gr.126516.111.
- 634 9. Drewes JL, White JR, Dejea CM, Fathi P, Iyadorai T, Vadivelu J, et al. High-resolution  
635 bacterial 16S rRNA gene profile meta-analysis and biofilm status reveal common colorectal  
636 cancer consortia. *npj Biofilms Microbiomes*. 2017;3.
- 637 10. Sinha R, Abu-Ali G, Vogtmann E, Fodor AA, Ren B, Amir A, et al. Assessment of variation  
638 in microbial community amplicon sequencing by the Microbiome Quality Control (MBQC)  
639 project consortium. *Nat Biotechnol*. 2017;35:1077.
- 640 11. Vogtmann E, Chen J, Amir A, Shi J, Abnet CC, Nelson H, et al. Comparison of collection  
641 methods for fecal samples in microbiome Studies. *Am J Epidemiol*. 2017;185:115–23.
- 642 12. Sinha R, Chen J, Amir A, Vogtmann E, Shi J, Inman KS, et al. Collecting Fecal Samples for  
643 Microbiome Analyses in Epidemiology Studies. *Cancer Epidemiol Biomarkers Prev*.  
644 2016;25:407–16. doi:10.1158/1055-9965.EPI-15-0951.
- 645 13. Jeraldo P, Chia N, Goldenfeld N. On the suitability of short reads of 16S rRNA for  
646 phylogeny-based analyses in environmental surveys. *Environ Microbiol*. 2011;13:3000–9.  
647 doi:10.1111/j.1462-2920.2011.02577.x.
- 648 14. Housseau F, Sears CL. Enterotoxigenic *Bacteroides fragilis* (ETBF)-mediated colitis in Min



- 649 (Apc<sup>+/-</sup>) mice: A human commensal-based murine model of colon carcinogenesis. *Cell Cycle*.  
650 2010;9:3–5.
- 651 15. Zackular JP, Baxter NT, Chen GY, Schloss PD. Manipulation of the Gut Microbiota Reveals  
652 Role in Colon Tumorigenesis. *mSphere*. 2016;1:e00001-15. doi:10.1128/mSphere.00001-15.
- 653 16. Bishehsari F, Engen PA, Preite NZ, Tuncil YE, Naqib A, Shaikh M, et al. Dietary fiber  
654 treatment corrects the composition of gut microbiota, promotes SCFA production, and  
655 suppresses colon carcinogenesis. *Genes (Basel)*. 2018;9.
- 656 17. Khazaie K, Zadeh M, Khan MW, Bere P, Gounari F, Dennis K, et al. Abating colon cancer  
657 polyposis by *Lactobacillus acidophilus* deficient in lipoteichoic acid. *Proc Natl Acad Sci*.  
658 2012;109:10462–7.
- 659 18. French AJ, Sargent DJ, Burgart LJ, Foster NR, Kabat BF, Goldberg R, et al. Prognostic  
660 significance of defective mismatch repair and BRAF V600E in patients with colon cancer. *Clin*  
661 *Cancer Res*. 2008;14:3408–15.
- 662 19. Guinney J, Dienstmann R, Wang X, De Reyniès A, Schlicker A, Soneson C, et al. The  
663 consensus molecular subtypes of colorectal cancer. *Nat Med*. 2015;21:1350.
- 664 20. Mårtensson A, Oberg A, Jung A, Cederquist K, Stenling R, Palmqvist R. Beta-catenin  
665 expression in relation to genetic instability and prognosis in colorectal cancer. *Oncol Rep*.  
666 2007;17:447–52.
- 667 21. Morkel M, Riemer P, Bläker H, Sers C. Similar but different: distinct roles for KRAS and  
668 BRAF oncogenes in colorectal cancer development and therapy resistance. *Oncotarget*.  
669 2015;6:20785–800.

- 670 22. Sweetser S, Jones A, Smyrk TC, Sinicrope FA. Sessile Serrated Polyps are Precursors of  
671 Colon Carcinomas With Deficient DNA Mismatch Repair. *Clin Gastroenterol Hepatol.*  
672 2016;14:1056–9.
- 673 23. Purcell R V., Visnovska M, Biggs PJ, Schmeier S, Frizelle FA. Distinct gut microbiome  
674 patterns associate with consensus molecular subtypes of colorectal cancer. *Sci Rep.*  
675 2017;7:11590. doi:10.1038/s41598-017-11237-6.
- 676 24. Belcheva A, Irrazabal T, Robertson SJJ, Streutker C, Maughan H, Rubino S, et al. Gut  
677 Microbial Metabolism Drives Transformation of Msh2-Deficient Colon Epithelial Cells. *Cell.*  
678 2014;158:288–99. doi:10.1016/j.cell.2014.04.051.
- 679 25. Chen J, Ryu E, Hathcock M, Ballman K, Chia N, Olson JE, et al. Impact of demographics on  
680 human gut microbial diversity in a US Midwest population. *PeerJ.* 2016;4:e1514.  
681 doi:10.7717/peerj.1514.
- 682 26. Hale VL, Chen J, Johnson S, Harrington SC, Yab TC, Smyrk TC, et al. Shifts in the fecal  
683 microbiota associated with adenomatous polyps. *Cancer Epidemiol Prev Biomarkers.*  
684 2017;26:85–94.
- 685 27. Sweetser S, Smyrk TC, Sinicrope FA. Serrated colon polyps as precursors to colorectal  
686 cancer. *Clinical Gastroenterology and Hepatology.* 2013;11:760–7.
- 687 28. Rashtak S, Rego R, Sweetser SR, Sinicrope FA. Sessile serrated polyps and colon cancer  
688 prevention. *Cancer Prevention Research.* 2017;10:270–8.
- 689 29. Callahan BJ, McMurdie PJ, Rosen MJ, Han AW, Johnson AJA, Holmes SP. DADA2: High-  
690 resolution sample inference from Illumina amplicon data. *Nat Methods.* 2016;13:581–3.

- 691 doi:10.1038/nmeth.3869.
- 692 30. Wang Q, Garrity GM, Tiedje JM, Cole JR. Naive Bayesian classifier for rapid assignment of  
693 rRNA sequences into the new bacterial taxonomy. *Appl Environ Microbiol.* 2007;73:5261–7.  
694 doi:10.1128/AEM.00062-07.
- 695 31. Quast C, Pruesse E, Yilmaz P, Gerken J, Schweer T, Yarza P, et al. The SILVA ribosomal  
696 RNA gene database project: improved data processing and web-based tools. *Nucleic Acids Res.*  
697 2013;41 Database issue:D590-6. doi:10.1093/nar/gks1219.
- 698 32. Kopylova E, Noé L, Touzet H. SortMeRNA: Fast and accurate filtering of ribosomal RNAs  
699 in metatranscriptomic data. *Bioinformatics.* 2012;28:3211–7.
- 700 33. Nawrocki EP, Eddy SR. Infernal 1.1: 100-fold faster RNA homology searches.  
701 *Bioinformatics.* 2013;29:2933–5. doi:10.1093/bioinformatics/btt509.
- 702 34. Price MN, Dehal PS, Arkin AP. FastTree 2 -- Approximately Maximum-Likelihood Trees  
703 for Large Alignments. *PLoS One.* 2010;5:e9490. doi:10.1371/journal.pone.0009490.
- 704 35. Lozupone C, Knight R. UniFrac: a New Phylogenetic Method for Comparing Microbial  
705 Communities. *Appl Environ Microbiol.* 2005;71:8228–35.
- 706 36. McMurdie PJ, Holmes S. phyloseq: An R Package for Reproducible Interactive Analysis and  
707 Graphics of Microbiome Census Data. *PLoS One.* 2013;8:e61217.  
708 doi:10.1371/journal.pone.0061217.
- 709 37. Oksanen J, Kindt R, Legendre P, O’Hara B, Simpson GL, Solymos PM, et al. The vegan  
710 package. *Community Ecol Packag.* 2008;:190.
- 711 38. Bolker BM, Brooks ME, Clark CJ, Geange SW, Poulsen JR, Stevens MHH, et al.

- 712 Generalized linear mixed models: a practical guide for ecology and evolution. *Trends Ecol Evol.*  
713 2009;24:127–35.
- 714 39. Brooks ME, Kristensen K, van Benthem KJ, Magnusson A, Berg CW, Nielsen A, et al.  
715 glmmTMB balances speed and flexibility among packages for zero-inflated generalized linear  
716 mixed modeling. *R J.* 2017;9:378–400.
- 717 40. Orth JD, Thiele I, Palsson BØ. What is flux balance analysis? *Nat Biotechnol.* 2010;28:245–  
718 8. doi:10.1038/nbt.1614.
- 719 41. Mendes-Soares H, Mundy M, Soares LM, Chia N. MMinte: an application for predicting  
720 metabolic interactions among the microbial species in a community. *BMC Bioinformatics.*  
721 2016;17:343.
- 722 42. Sung J, Kim S, Cabatbat JJT, Jang S, Jin Y-S, Jung GY, et al. Global metabolic interaction  
723 network of the human gut microbiota for context-specific community-scale analysis. *Nat*  
724 *Commun.* 2017;8:15393.
- 725 43. Shannon P, Markiel A, Ozier O, Baliga NS, Wang JT, Ramage D, et al. Cytoscape: A  
726 software Environment for integrated models of biomolecular interaction networks. *Genome Res.*  
727 2003;13:2498–504.
- 728 44. Wattam AR, Abraham D, Dalay O, Disz TL, Driscoll T, Gabbard JL, et al. PATRIC, the  
729 bacterial bioinformatics database and analysis resource. *Nucleic Acids Res.* 2014;42:D581–91.  
730 doi:10.1093/nar/gkt1099.
- 731 45. Anand S, Kaur H, Mande SS. Comparative In silico Analysis of Butyrate Production  
732 Pathways in Gut Commensals and Pathogens. *Front Microbiol.* 2016;7:1945.

733 doi:10.3389/fmicb.2016.01945.

734 46. Chung L, Thiele Orberg E, Geis AL, Chan JL, Fu K, DeStefano Shields CE, et al.

735 *Bacteroides fragilis* Toxin Coordinates a Pro-carcinogenic Inflammatory Cascade via Targeting  
736 of Colonic Epithelial Cells. *Cell Host Microbe*. 2018;23:203–214.e5.

737 47. Koi M, Okita Y, M. Carethers J. *Fusobacterium nucleatum* Infection in Colorectal Cancer:

738 Linking Inflammation, DNA Mismatch Repair and Genetic and Epigenetic Alterations. *J Anus,*  
739 *Rectum Colon*. 2018;2:37–46.

740 48. Kostic AD, Gevers D, Pedamallu CS, Michaud M, Duke F, Earl AM, et al. Genomic analysis

741 identifies association of *Fusobacterium* with colorectal carcinoma. *Genome Res*. 2012;22:292–8.

742 doi:10.1101/gr.126573.111.

743 49. Abed J, Emgård JEM, Zamir G, Faroja M, Almogy G, Grenov A, et al. Fap2 Mediates

744 *Fusobacterium nucleatum* Colorectal Adenocarcinoma Enrichment by Binding to Tumor-

745 Expressed Gal-GalNAc. *Cell Host Microbe*. 2016;20:215–25. doi:10.1016/j.chom.2016.07.006.

746 50. Dejea CM, Fathi P, Craig JM, Boleij A, Taddese R, Geis AL, et al. Patients with familial

747 adenomatous polyposis harbor colonic biofilms containing tumorigenic bacteria. *Science* (80- ).

748 2018;359:592–7. doi:10.1126/science.aah3648.

749 51. Coyte KZ, Schluter J, Foster KR. The ecology of the microbiome: Networks, competition,

750 and stability. *Science* (80- ). 2015;350:663–6. doi:10.1126/science.aad2602.

751 52. Eschbach M, Schreiber K, Trunk K, Buer J, Jahn D, Schobert M. Long-term anaerobic

752 survival of the opportunistic pathogen *Pseudomonas aeruginosa* via pyruvate fermentation. *J*

753 *Bacteriol*. 2004;186:4596–604.

- 754 53. Rivièrè A, Selak M, Lantin D, Leroy F, De Vuyst L. Bifidobacteria and butyrate-producing  
755 colon bacteria: Importance and strategies for their stimulation in the human gut. *Frontiers in*  
756 *Microbiology*. 2016;7 JUN.
- 757 54. Pryde SE, Duncan SH, Hold GL, Stewart CS, Flint HJ. The microbiology of butyrate  
758 formation in the human colon. *FEMS Microbiology Letters*. 2002;217:133–9.
- 759 55. Sousa CP. The versatile strategies of *Escherichia coli* pathotypes: a mini review. *Rev Lit Arts*  
760 *Am*. 2006;12:363–73.
- 761 56. Ulbrich K, Reichardt N, Braune A, Kroh LW, Blaut M, Rohn S. The microbial degradation  
762 of onion flavonol glucosides and their roasting products by the human gut bacteria *Eubacterium*  
763 *ramulus* and *Flavonifractor plautii*. *Food Res Int*. 2015;67:349–55.
- 764 57. Louis P, Flint HJ. Formation of propionate and butyrate by the human colonic microbiota.  
765 *Environmental Microbiology*. 2017;19:29–41.
- 766 58. Jia F. Genome Sequence of the Oral Probiotic *Streptococcus salivarius* JF. *Genome*  
767 *Announc*. 2016;4:e00971-16.
- 768 59. Van Den Abbeele P, Belzer C, Goossens M, Kleerebezem M, De Vos WM, Thas O, et al.  
769 Butyrate-producing *Clostridium* cluster XIVa species specifically colonize mucins in an in vitro  
770 gut model. *ISME J*. 2013;7:949–61.
- 771 60. Imachi H, Sekiguchi Y, Kamagata Y, Hanada S, Ohashi A, Harada H. *Pelotomaculum*  
772 *thermopropionicum* gen. nov., sp. nov., an anaerobic, thermophilic, syntrophic propionate-  
773 oxidizing bacterium. *Int J Syst Evol Microbiol*. 2002;52:1729–35.
- 774 61. Dehoux P, Marvaud JC, Abouelleil A, Earl AM, Lambert T, Dauga C. Comparative

- 775 genomics of *Clostridium bolteae* and *Clostridium clostridioforme* reveals species-specific  
776 genomic properties and numerous putative antibiotic resistance determinants. *BMC Genomics*.  
777 2016;17.
- 778 62. Kageyama A, Benno Y. *Coprobacillus catenaformis* gen. nov., sp. nov., a new genus and  
779 species isolated from human feces. *Microbiol Immunol*. 2000;44:23–8.
- 780 63. Wannemuehler MJ, Overstreet A, Ward D V, Phillips GJ. Draft genome sequences of the  
781 altered schaedler flora, a defined bacterial community from gnotobiotic mice. *Genome Announc*.  
782 2014;2:1–2.
- 783 64. Jeraldo P, Hernández Á, White BA, O’Brien D, Ahlquist D, Boardman L, et al. Draft  
784 Genome Sequences of 24 Microbial Strains Assembled from Direct Sequencing from 4 Stool  
785 Samples. *Genome Announc*. 2015;3:e00526-15. doi:10.1128/genomeA.00526-15.
- 786 65. Tatusova T, Ciufu S, Fedorov B, O’Neill K, Tolstoy I. RefSeq microbial genomes database:  
787 new representation and annotation strategy (vol 42, pg 553, 2014). *Nucleic Acids Res*.  
788 2015;43:3872.
- 789 66. Han YW. *Fusobacterium nucleatum*: A commensal-turned pathogen. *Current Opinion in*  
790 *Microbiology*. 2015.
- 791 67. Lawson PA, Song Y, Liu C, Molitoris DR, Vaisanen ML, Collins MD, et al. *Anaerotruncus*  
792 *colihominis* gen. nov., sp. nov., from human faeces. *Int J Syst Evol Microbiol*. 2004;54:413–7.
- 793 68. Louis P, Flint HJ. Diversity, metabolism and microbial ecology of butyrate-producing  
794 bacteria from the human large intestine. *FEMS Microbiol Lett*. 2009;294:1–8.
- 795 69. Shinha T. Fatal Bacteremia Caused by *Campylobacter gracilis*, United States. *Emerg Infect*

- 796 Dis. 2015;21:1084–5. doi:10.3201/eid2106.142043.
- 797 70. Attene-Ramos MS, Nava GM, Muellner MG, Wagner ED, Plewa MJ, Gaskins HR. DNA  
798 damage and toxicogenomic analyses of hydrogen sulfide in human intestinal epithelial FHs 74  
799 int cells. *Environ Mol Mutagen.* 2010;51:304–14.
- 800 71. Wolf PG, Parthasarathy G, Chen J, O'Connor HM, Chia N, Bharucha AE, et al. Assessing  
801 the colonic microbiome, hydrogenogenic and hydrogenotrophic genes, transit and breath  
802 methane in constipation. *Neurogastroenterol Motil.* 2017.
- 803 72. Lee ZW, Zhou J, Chen CS, Zhao Y, Tan CH, Li L, et al. The slow-releasing Hydrogen  
804 Sulfide donor, GYY4137, exhibits novel anti-cancer effects in vitro and in vivo. *PLoS One.*  
805 2011;6.
- 806 73. Hellmich MR, Coletta C, Chao C, Szabo C. The Therapeutic Potential of Cystathionine  $\beta$ -  
807 Synthetase/Hydrogen Sulfide Inhibition in Cancer. *Antioxid Redox Signal.* 2015;22:424–48.
- 808 74. Richman S. Deficient mismatch repair: Read all about it (Review). *International Journal of*  
809 *Oncology.* 2015;47:1189–202.
- 810 75. Cai W, Wang M, Ju L, Wang C, Zhu Y. Hydrogen sulfide induces human colon cancer cell  
811 proliferation: role of Akt, ERK and p21. *Cell Biol Int.* 2010;34:565–72.
- 812 76. Purcell R V., Pearson J, Aitchison A, Dixon L, Frizelle FA, Keenan JI. Colonization with  
813 enterotoxigenic *Bacteroides fragilis* is associated with early-stage colorectal neoplasia. *PLoS*  
814 *One.* 2017;12.
- 815 77. Maiuri AR, Peng M, Sriramkumar S, Kamplain CM, DeStefano Shields CE, Sears CL, et al.  
816 Mismatch repair proteins initiate epigenetic alterations during inflammation-driven



817 tumorigenesis. *Cancer Res.* 2017;77:3467–78.

818 78. Lupton JR. Microbial degradation products influence colon cancer risk: the butyrate

819 controversy. *J Nutr.* 2004;134:479–82.

820 79. Magnúsdóttir S, Thiele I. Modeling metabolism of the human gut microbiome. *Current*

821 *Opinion in Biotechnology.* 2018;51:90–6.

822 80. Benedict MN, Mundy MB, Henry CS, Chia N, Price ND. Likelihood-Based Gene

823 Annotations for Gap Filling and Quality Assessment in Genome-Scale Metabolic Models. *PLoS*

824 *Comput Biol.* 2014;10:e1003882. doi:10.1371/journal.pcbi.1003882.

825 81. Magnúsdóttir S, Heinken A, Kutt L, Ravcheev DA, Bauer E, Noronha A, et al. Generation of

826 genome-scale metabolic reconstructions for 773 members of the human gut microbiota. *Nat*

827 *Biotechnol.* 2016. doi:10.1038/nbt.3703.

828

829

830 **Additional File 1**

831 **Figure S1:** Venn diagram highlighting number of microbes that overlap between tumor and  
832 normal samples in relation to MMR status (dMMR = red font, pMMR = green font, red circles =  
833 tumor samples, blue circles = normal samples). Only differentially abundant microbes with a  
834 corrected p-value < 0.05 were included in this diagram.

835 **Figure S2:** Differentially abundant OTUs between patient–matched tumor and normal samples  
836 in individuals with dMMR CRC. Y-axis indicates percent relative abundance of OTUs. Line  
837 color indicates directionality of change in microbial abundance: red = increased abundance  
838 relative to normal, blue = decreased abundance or no change compared to normal.

839 **Table S1.** Factors contributing to variance between microbial communities. Sample location was  
840 included as the last variable in this model (PERMANOVA).

841 **Table S2.** Factors contributing to variance between microbial communities. Sample location was  
842 included as the last variable in this model (PERMANOVA).

843 **Table S3:** sOTUs enriched in tumor samples (colon tissue and mucosa) as compared to normal–  
844 adjacent samples in individuals with dMMR CRC.

845 **Table S4:** sOTUs enriched in tumor samples (colon tissue and mucosa) as compared to normal–  
846 adjacent samples in individuals with pMMR CRC.

847 **Table S5:** Differentially abundant microbes in individuals with dMMR CRC. Blue boxes  
848 highlight microbes enriched in tumor tissue samples as compared to normal–adjacent samples.

849 **Table S6:** Differentially abundant microbes in individuals with pMMR CRC. Blue boxes  
850 highlight microbes enriched in tumor tissue samples as compared to normal–adjacent samples.

a)

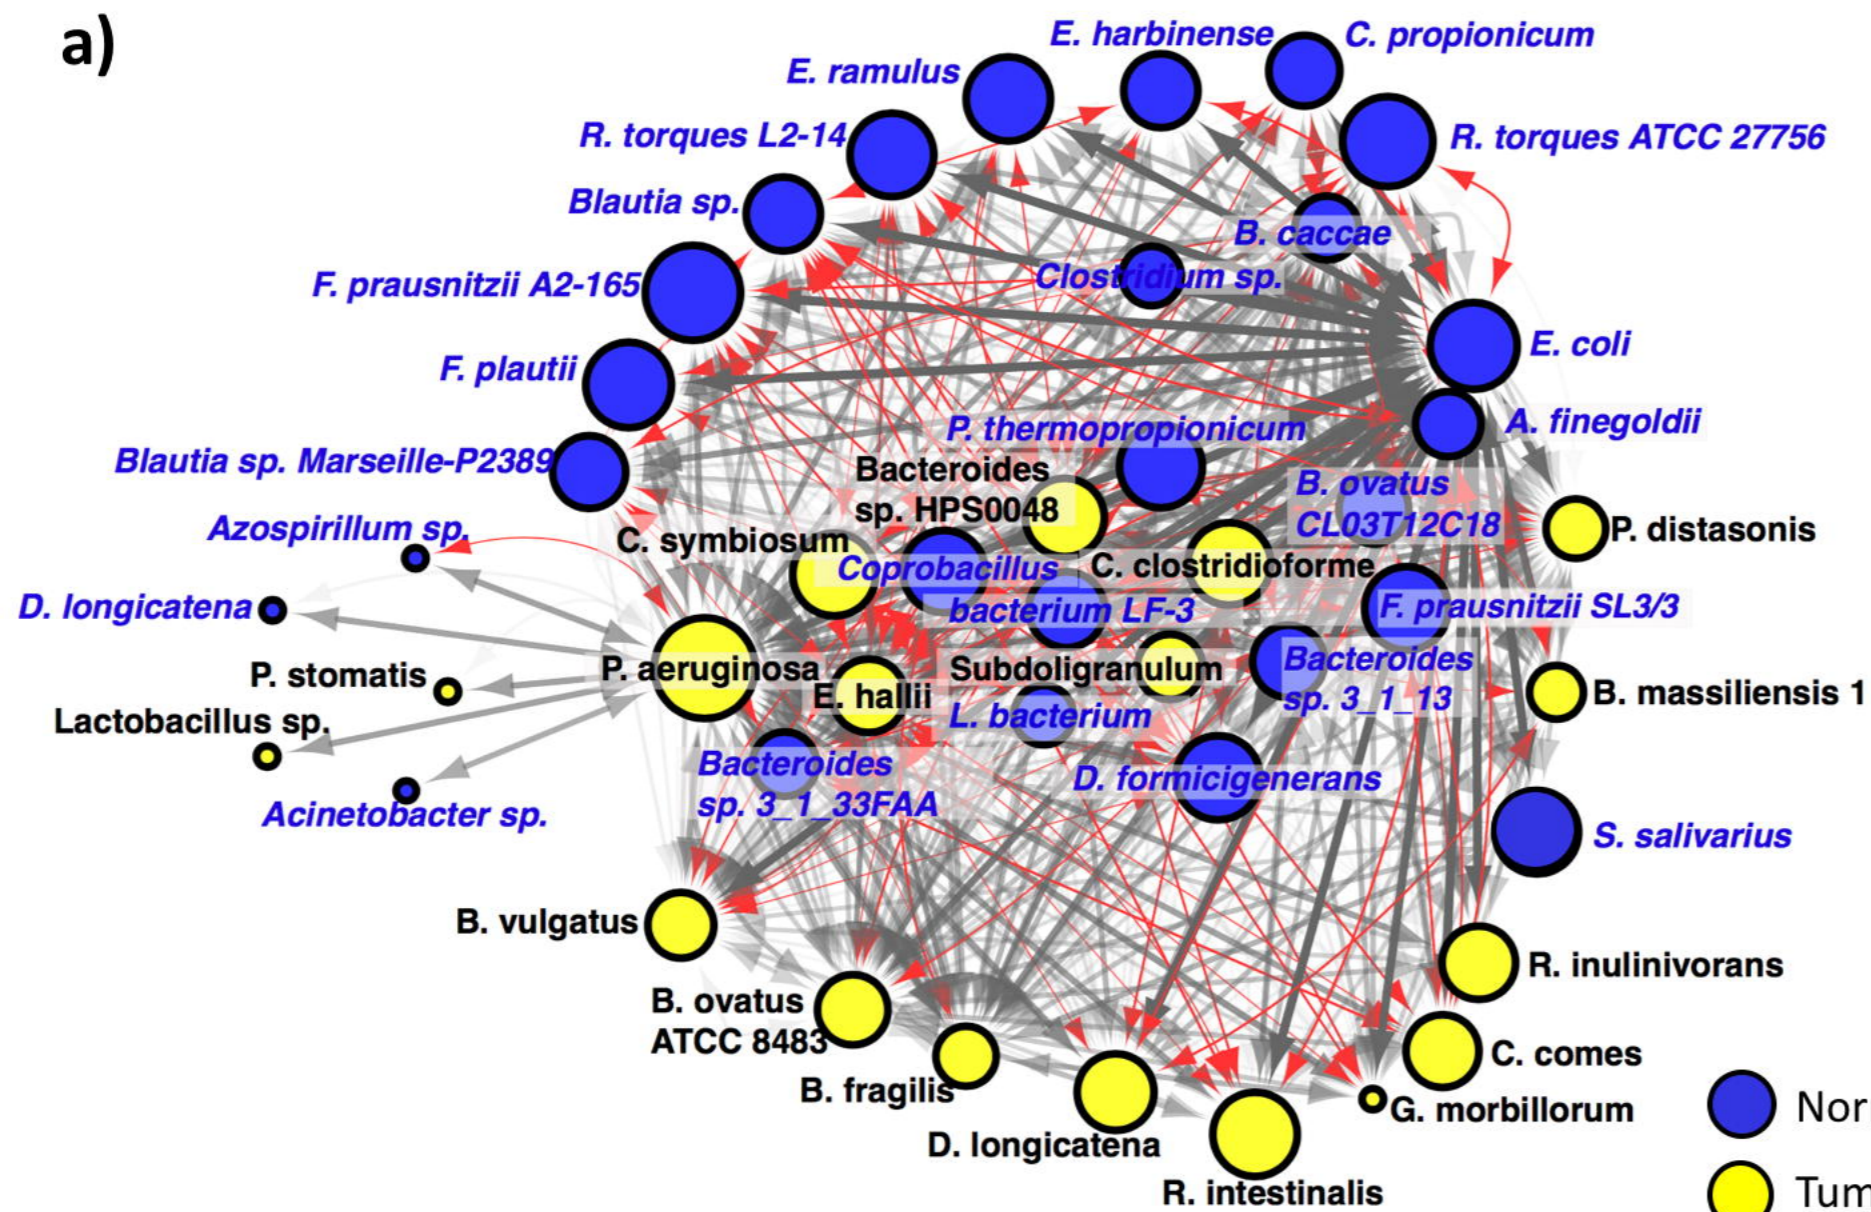

dMMR

● Normal-associated microbe  
● Tumor-associated microbe

→ Positive interaction

→ Negative interaction

b)

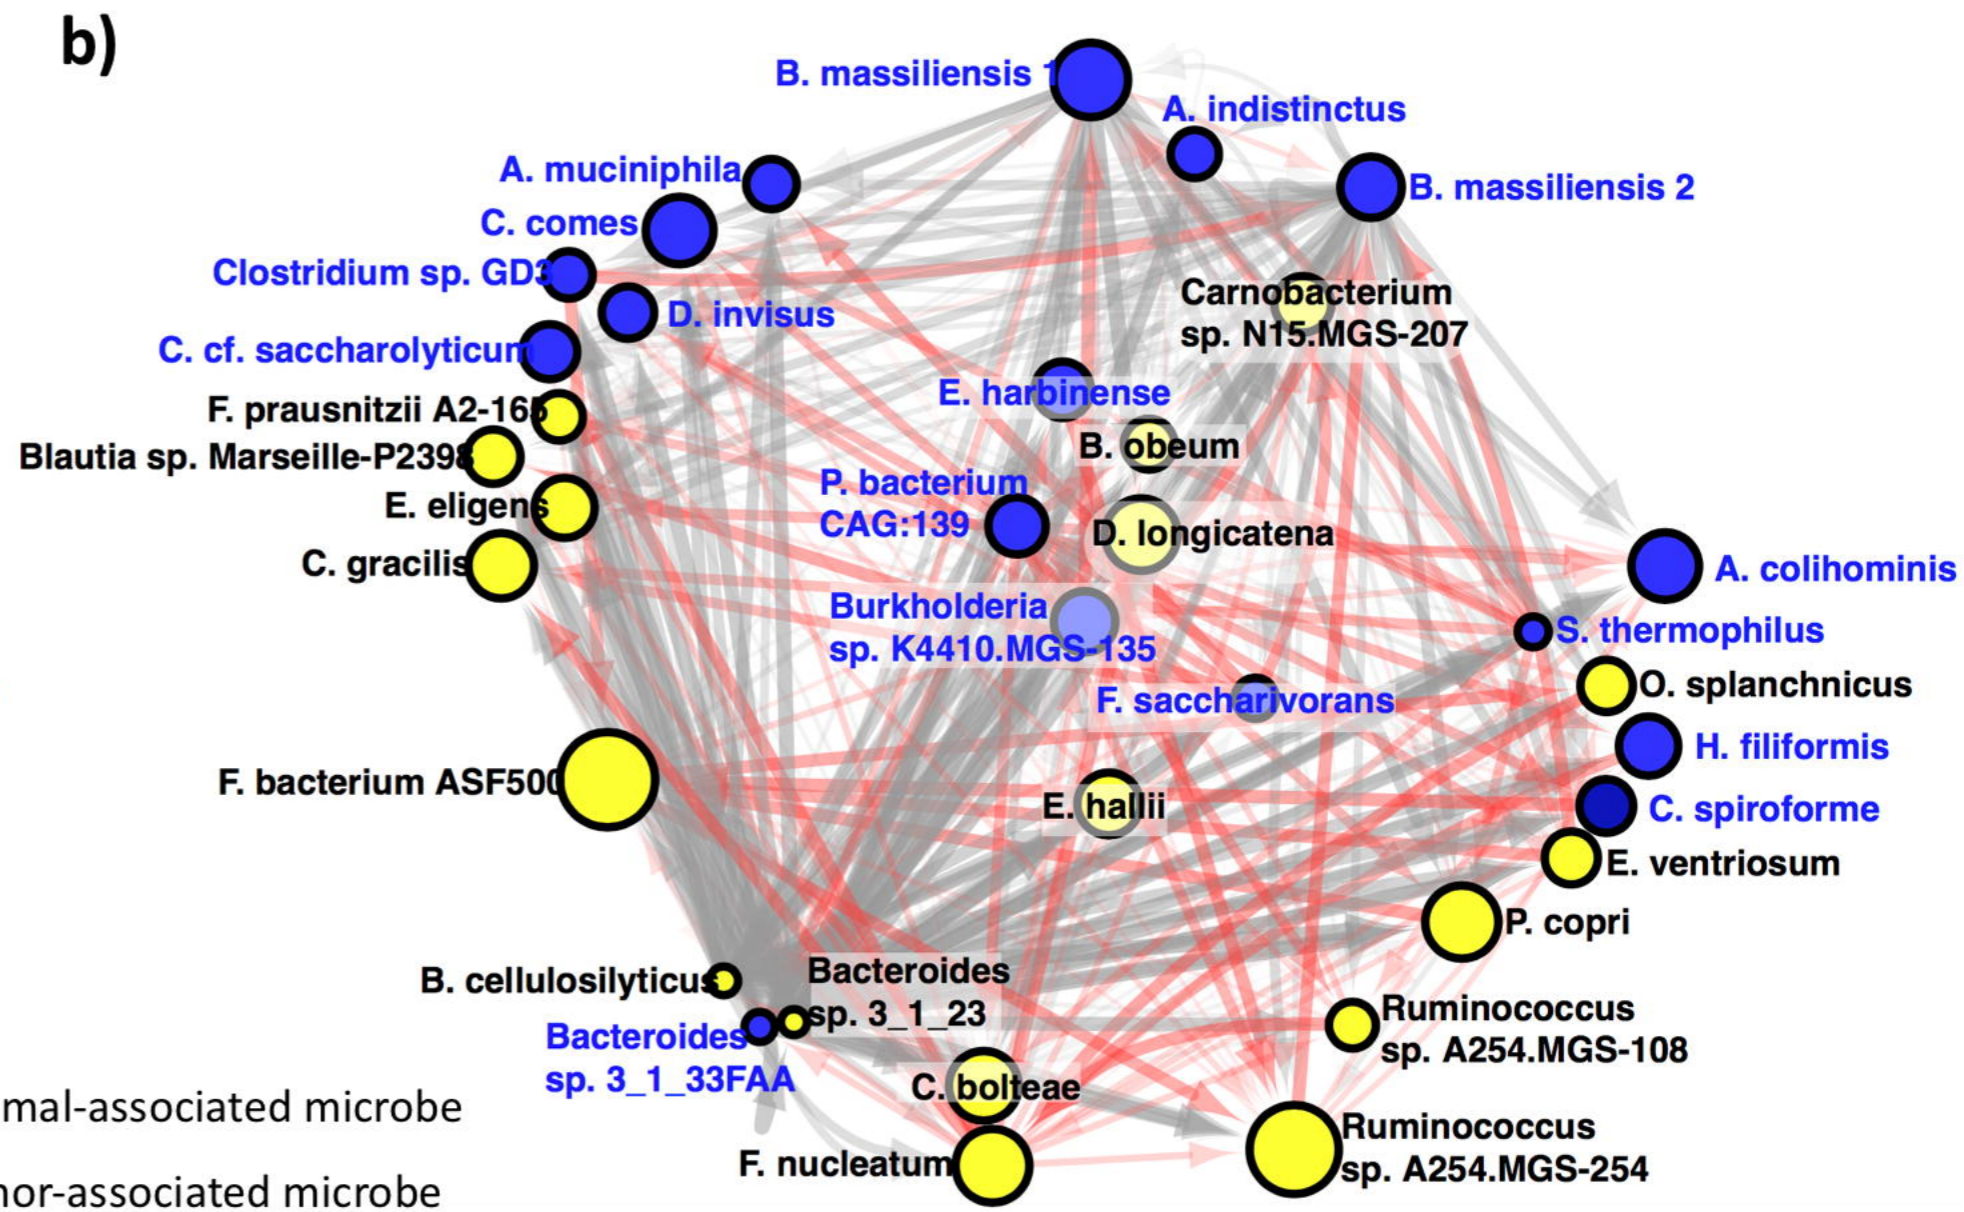

pMMR

**dMMR Tumor**

**dMMR Normal**

*Bacteroides fragilis* YCH46  
*Fusobacterium periodonticum* 2\_1\_31  
*Fusobacterium nucleatum* CTI-5\*  
*Roseburia intestinalis* M50/1\*  
*Bacteroides* sp. HPS0048  
*Peptostreptococcus stomatis* DSM 17678  
*Clostridium clostridioforme* 90A1  
*[Clostridium] symbiosum*  
*Pseudomonas aeruginosa* strain NCTC10332  
***Coprococcus comes* ATCC 27758**  
*Eggerthella lenta* DSM 2243  
*Roseburia inulinivorans*\*  
***Bacteroides massiliensis* B84634**  
*Bacteroides vulgatus* ATCC 8482  
*Parabacteroides distasonis* ATCC 8503  
***Dorea longicatena***  
*Lactobacillus* sp. N15.MGS-260  
*Bacteroides ovatus* strain ATCC 8483  
*Subdoligranulum* sp. 4\_3\_54A2FAA\*  
*[Eubacterium] hallii*\*

\*major butyrate producers

*Bacteroides* sp. 3\_1\_33FAA  
*Escherichia coli* str. K-12 substr. MG1655  
*Ruminococcus torques* ATCC 27756\*  
*Bacteroides vulgatus* ATCC 8482  
*Bacteroides ovatus* CL03T12C18  
*Faecalibacterium prausnitzii* SL3/3\*  
***Faecalibacterium prausnitzii* A2-165\***  
*Bacteroides* sp. 3\_1\_13  
*Clostridium* sp. JCC  
*Alistipes finegoldii*  
*Lachnospiraceae bacterium* mt14\*  
*bacterium* LF-3  
***Blautia* sp. Marseille-P2398\***  
*Coprobacillus* sp. 8\_1\_38FAA  
*Ruminococcus torques* L2-14\*  
*Eubacterium ramulus*  
*Dorea longicatena* DSM 13814  
*Streptococcus salivarius* strain JF  
***Ethanoligenens harbinense* YUAN-3**  
*Bacteroides caccae* CL03T12C61  
*Azospirillum* sp. CAG:260  
*Dorea formicigenerans* ATCC 27755  
*Pelotomaculum thermopropionicum* SI  
*Acinetobacter* sp. N54.MGS-139  
*[Clostridium] propionicum* DSM 1682

**pMMR Tumor**

**pMMR Normal**

*Prevotella copri* DSM 18205  
*Ruminococcus* sp. A254.MGS-108\*  
*Odoribacter splanchnicus* DSM 220712\*  
*Campylobacter gracilis* strain ATCC 33236  
*Bacteroides cellulosilyticus* strain WH2  
*Bacteroides* sp. 3\_1\_23  
*Firmicutes bacterium* ASF500\*  
*Clostridium bolteae* 90A9\*  
***Blautia* sp. Marseille-P2398\***  
***Dorea longicatena***  
***Faecalibacterium prausnitzii* A2-165\***  
*Ruminococcus* sp. A254.MGS-254\*

***Bacteroides massiliensis* B84634**  
***Ethanoligenens harbinense* YUAN-3**  
***Coprococcus comes* ATCC 27758**  
*Dialister invisus* DSM 15470  
*Proteobacteria bacterium* CAG:139  
*Clostridium* cf. *saccharolyticum* K10\*  
*Fusicatenibacter saccharivorans*  
*Holdemania filiformis* DSM 12042  
*Burkholderia* sp. K4410.MGS-135

a)

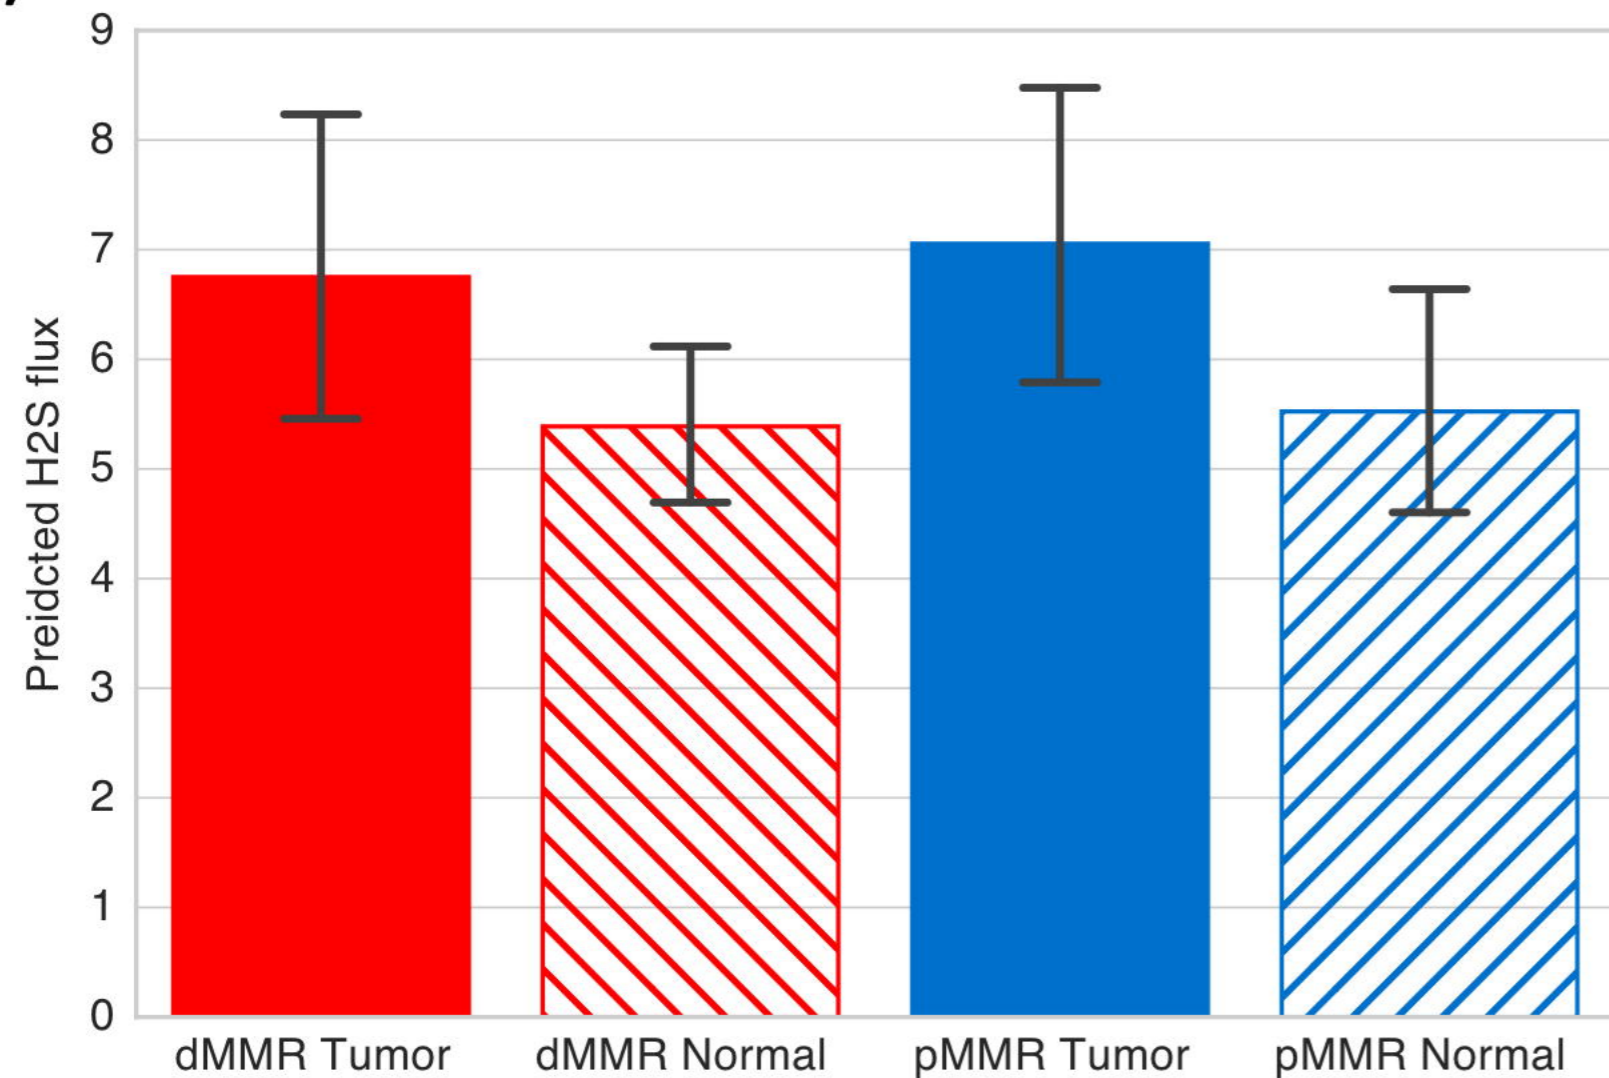

b)

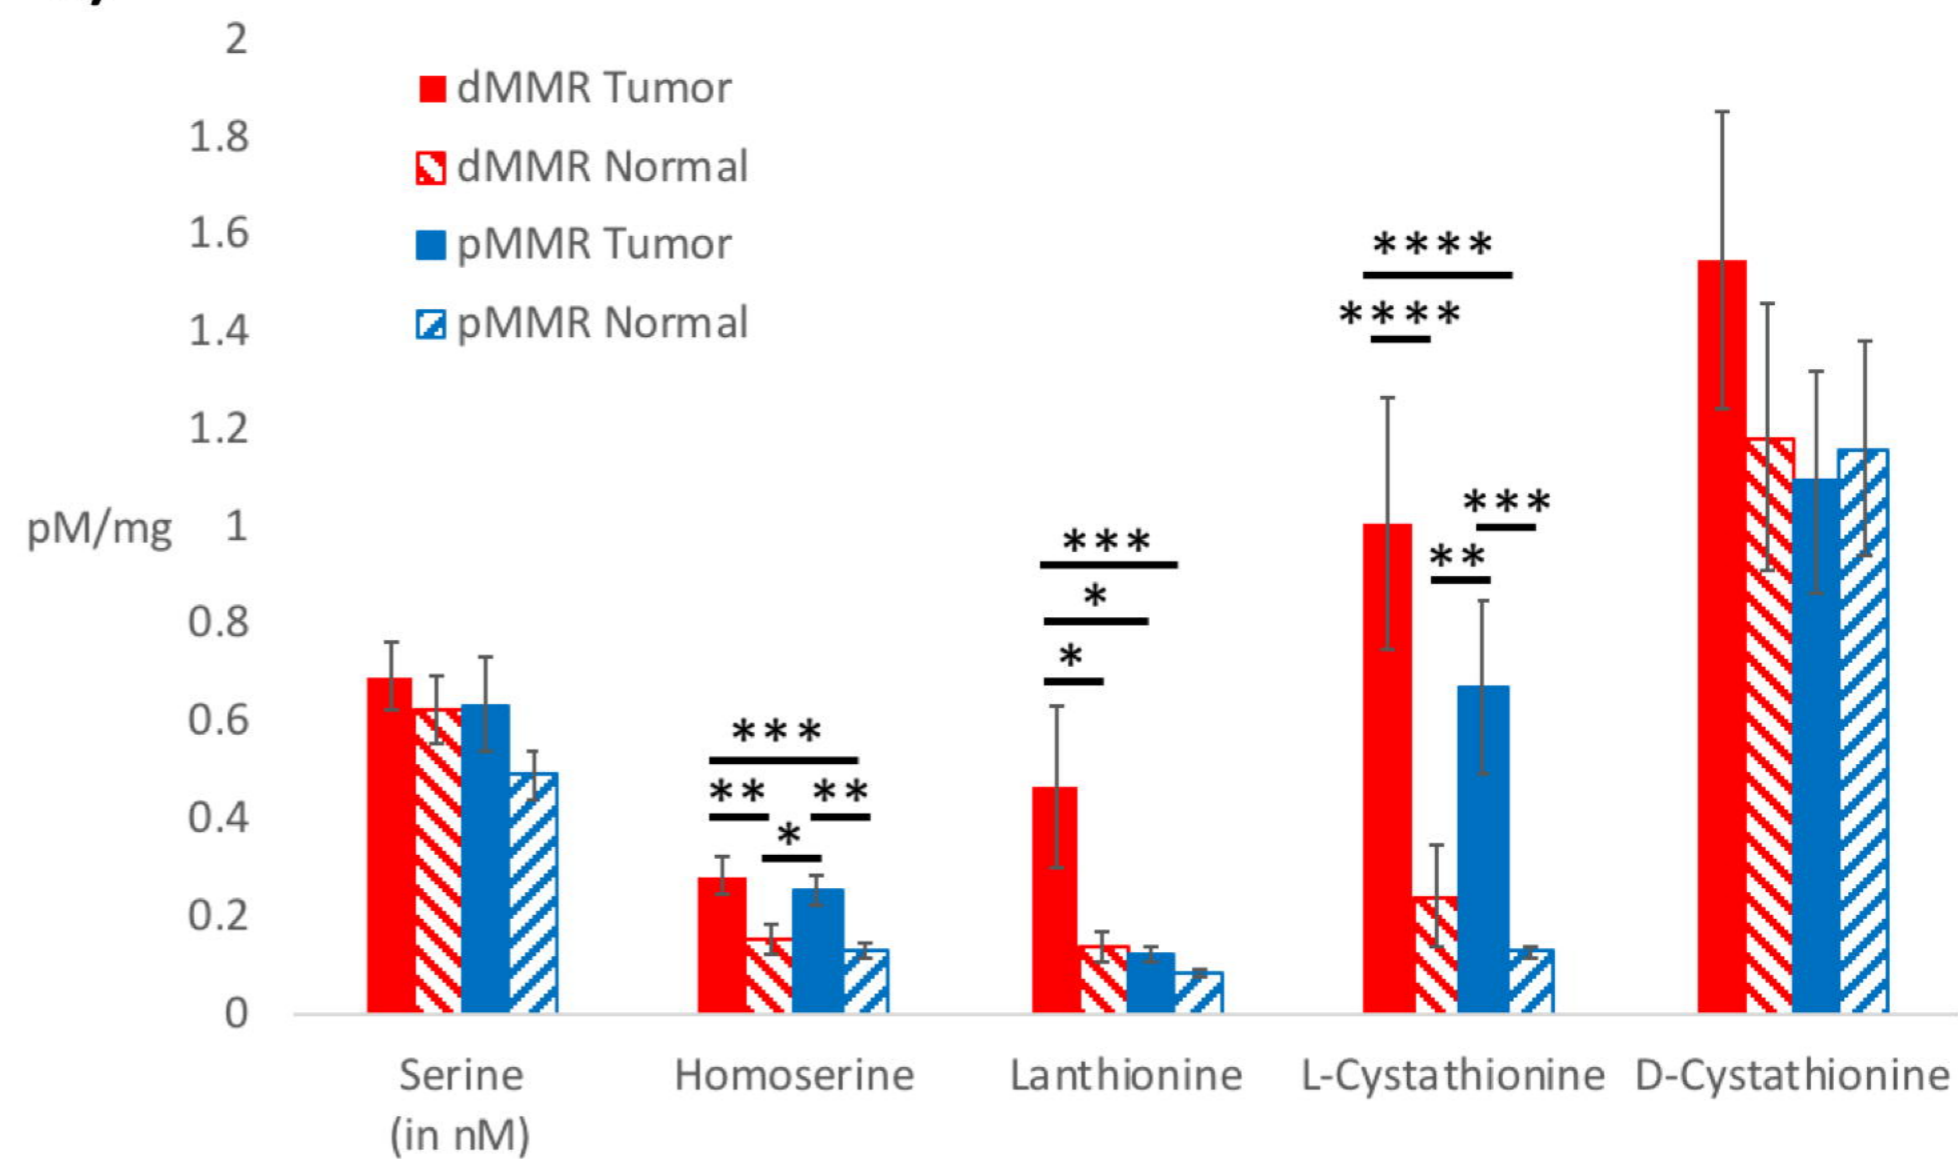

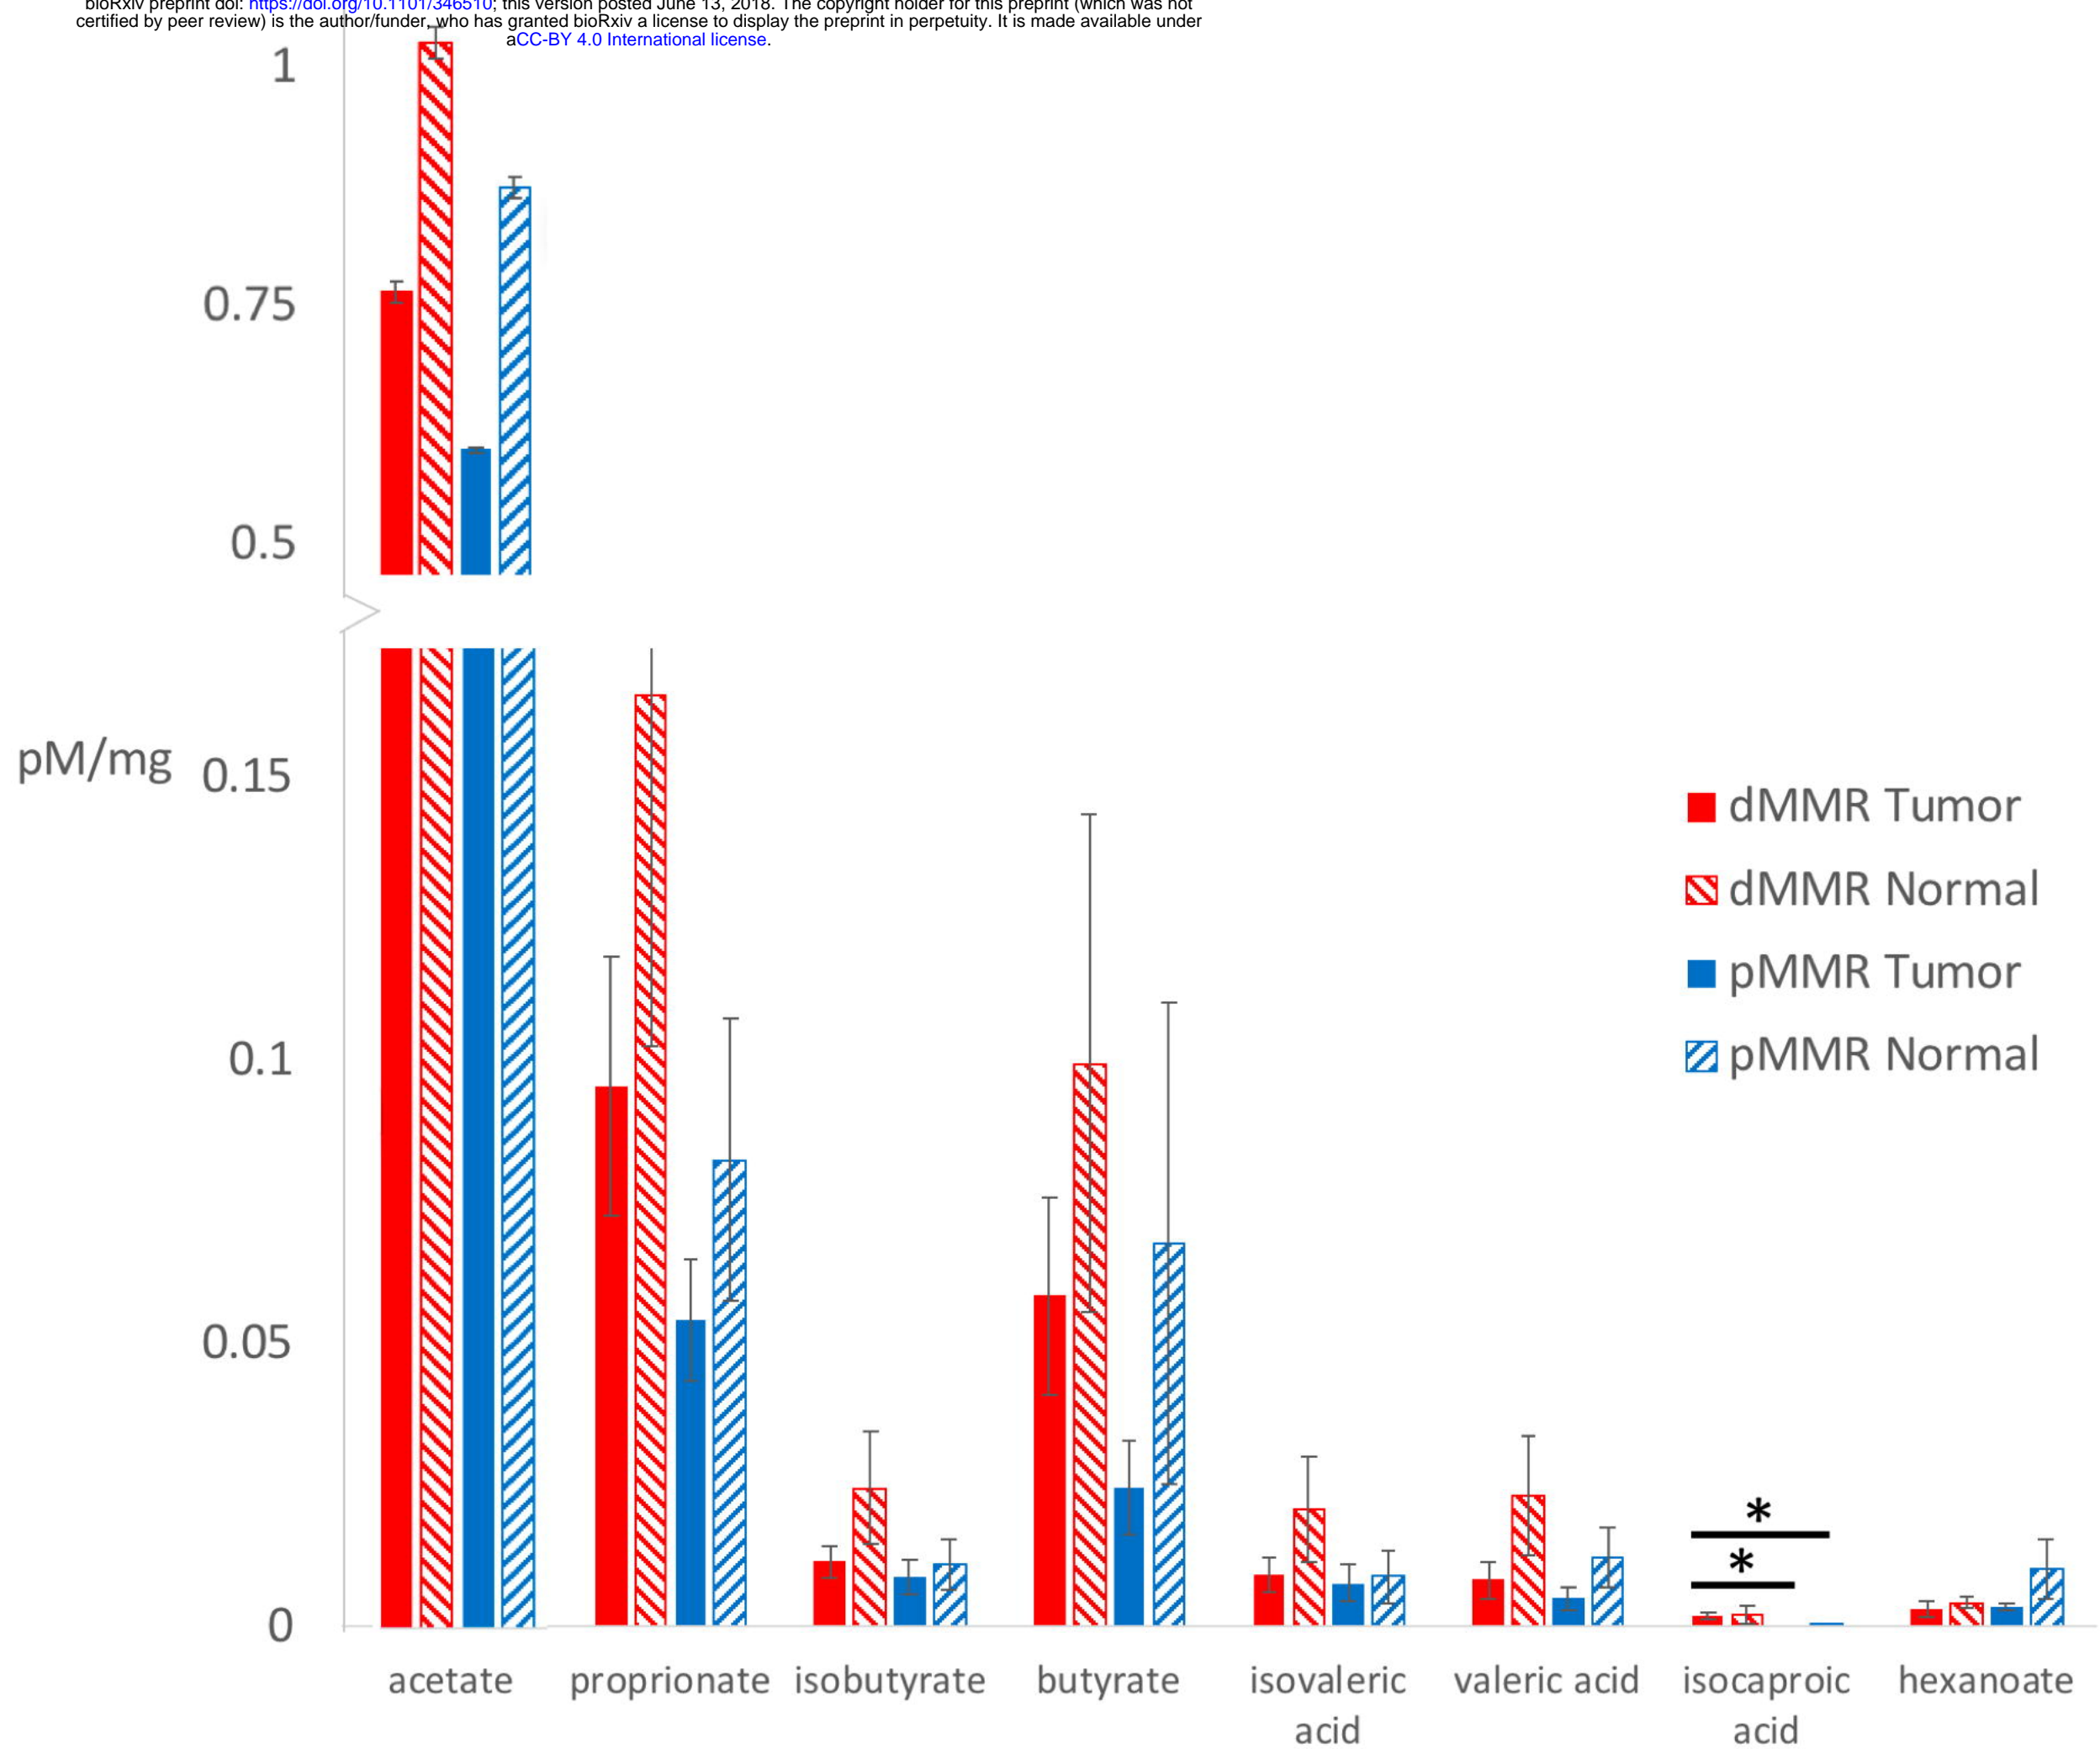

Source: https://www.biorxiv.org/content/10.1101/346510v1.full.pdf
